# Supplementary material for: GSVD Comparison of Patient-Matched Normal and Tumor aCGH Profiles Reveals Global Copy-Number Alterations Predicting Glioblastoma Multiforme Survival
Source: PubMed Central journal article supplement (PMC3264559; doi:10.1371/journal.pone.0030098), 2012-01-23
Supplement: pone.0030098.s003.pdf [file pone.0030098.s003.pdf]

```
(* © Benjamin O. Alpert and Orly Alter 2012, All Rights Reserved *)
```

```
(* GSVD of Patient-Matched Tumor and Normal aCGH Datasets *)
```

```
(* Initialize *)
```

```
Clear["Global`*"]
```

```
(* Define Path to Datasets *)
```

```
path = "Desktop/TCGA/";
```

```
(* Read aCGH Tumor and Normal Datasets *)
```

```
stream = path <> "251_Tumor.txt";  
tumorData = Import[stream, "Table"];  
stream = path <> "251_Normal.txt";  
normalData = Import[stream, "Table"];
```

```
(* Extract Probe IDs and Array Names *)
```

```
tumorArrayNames = Drop[tumorData[[1]], 3];  
tumorProbeID = Drop[tumorData[[All, 1]], 1];  
tumorProbeLoc = Drop[tumorData[[All, 2 ;; 3]], 1];  
tumorData = Drop[tumorData, 1, 3];  
normalArrayNames = Drop[normalData[[1]], 3];  
normalProbeID = Drop[normalData[[All, 1]], 1];  
normalProbeLoc = Drop[normalData[[All, 2 ;; 3]], 1];  
normalData = Drop[normalData, 1, 3];
```

```
{tumorProbes, arrays} = Dimensions[tumorData]  
{normalProbes, arrays} = Dimensions[normalData]
```

```
{212696, 251}
```

```
{211227, 251}
```

```
(* Compute GSVD *)
```

```
(* Compute the QR Decomposition of the Appended Tumor and Normal Datasets *)
```

```
data = Join[tumorData, normalData];  
{q, r} = QRDecomposition[data];  
q = Transpose[q];
```

```
(* Compute the SVD of the Tumor Block of Q *)
```

```
q1 = q[[1 ;; tumorProbes]];  
{u1, w1, vt1} = SingularValueDecomposition[q1, arrays];  
vt1 = Transpose[vt1].r;  
d1 = DiagonalMatrix[Diagonal[Sqrt[vt1.Transpose[vt1]]]];  
Do[vt1[[a]] = vt1[[a]] / d1[[a, a]], {a, 1, arrays}];  
d1 = w1.d1;  
probelets = vt1;  
tumorArraylets = u1;
```

```
(* Compute the SVD of the Normal Block of Q *)
```

```
q2 = q[[tumorProbes + 1 ;; normalProbes + tumorProbes]];  
{u2, w2, vt2} = SingularValueDecomposition[q2, arrays];  
vt2 = Transpose[vt2].r;  
d2 = DiagonalMatrix[Diagonal[Sqrt[vt2.Transpose[vt2]]]];  
Do[vt2[[a]] = vt2[[a]] / d2[[a, a]], {a, 1, arrays}];
```

```
(* Order the SVD of the Normal Block of Q by Ascending Singular Values *)
```

```
vt2 = Transpose[Take[
  Transpose[Sort[
    Transpose[
      Join[{Diagonal[w2]}, Transpose[vt2]]
    ]][[2 ;; arrays + 1]]];
d2 = DiagonalMatrix[
  Sort[Diagonal[w2]] *
  Transpose[Sort[
    Transpose[
      Join[{Diagonal[w2]}, {Diagonal[d2]}]
    ]][[2]]];
normalArraylets =
  Take[Transpose[
    Sort[Transpose[
      Join[{Diagonal[w2]}, u2]
    ]][[2 ;; normalProbes + 1]]];
signs = DiagonalMatrix[Diagonal[vt2.Transpose[vt1]]];
vt2 = signs.vt2;
normalArraylets = normalArraylets.signs;
```

```
(* Define the Sign of the Second Probelet and Corresponding Tumor and Normal Arraylets *)
```

```
probelets[[2]] = -probelets[[2]];
tumorArraylets[[All, 2]] = -tumorArraylets[[All, 2]];
normalArraylets[[All, 2]] = -normalArraylets[[All, 2]];
```

```
(* Display Significant Probelets and Corresponding Tumor and Normal Arraylets *)
```

```
rasterContrast = 2;
resolution = 3600;
```

```
(* Create Raster Displays of Tumor and Normal Datasets *)
```

```
step = 100;

binnedTumorData = Table[
  Mean[tumorData[[a ;; a + step - 1]]], {a, 1, Floor[tumorProbes, step], step}];
{binnedRows, arrays} = Dimensions[binnedTumorData];
raster = Table[
  adjustedValue = binnedTumorData[[a, b]];
  If[adjustedValue > 0,
    {adjustedValue, 0, 0},
    {0, adjustedValue, 0}],
  {a, 1, binnedRows}, {b, 1, arrays}];
raster[[All, All, 2]] = -raster[[All, All, 2]];
rawTumorRaster = raster;

binnedNormalData = Table[
  Mean[normalData[[a ;; a + step - 1]]], {a, 1, Floor[normalProbes, step], step}];
{binnedRows, arrays} = Dimensions[binnedNormalData];
raster = Table[
  adjustedValue = binnedNormalData[[a, b]];
  If[adjustedValue > 0,
    {adjustedValue, 0, 0},
    {0, adjustedValue, 0}],
  {a, 1, binnedRows}, {b, 1, arrays}];
raster[[All, All, 2]] = -raster[[All, All, 2]];
rawNormalRaster = raster;
```

```
(* Sort Selected Probelet and Arraylet *)
```

```
sortData[probeletAnnotationColors_, raster_, sample_] := {  
  c = .5;  
  sortProbelets = Sort[probelets[[pattern]]];  
  sortProbeletAnnotationColors = probeletAnnotationColors[[Ordering[probelets[[pattern]]]]];  
  sortRaster = Transpose[raster[[All, Ordering[probelets[[pattern]]]]]];  
  d = .5;  
  If[sample == "Tumor", {  
    arraylet = tumorArraylets[[All, pattern]];  
    chromosomeDefinitions = tumorChromosomeDefinitions;  
    chromosomeBounds = tumorChromosomeBounds},  
  {arraylet = normalArraylets[[All, pattern]];  
  chromosomeDefinitions = normalChromosomeDefinitions;  
  chromosomeBounds = normalChromosomeBounds}};  
}
```

```
(* Define Label Coordinates *)
```

```
figureVariables[arraylet_, sortProbelets_, arrayletRange_] := {  
  genes = Dimensions[arraylet][[1]];  
  range =  
    {{Min[sortProbelets] - .01, 0}, {Max[sortProbelets] + .01, Dimensions[sortProbelets][[1]]}};  
  arrayletsXLabels = {ToString[arrayletRange[[1]], "0", ToString[arrayletRange[[2]]]};  
  xScaleFactor = genes * .15 / (range[[2, 1]] - range[[1, 1]]);  
  range[[All, 1]] = range[[All, 1]] * xScaleFactor;  
  xOffset = range[[2, 1]] + genes * .01;  
  ylabels = {1, 50, 100, 150, 200, 250};  
  dotsScaleFactor = 5000 + 1000;  
  yOffset = 320;  
  dotsOffset = yOffset - Mean[arrayletRange] * dotsScaleFactor;  
  numChromosomes = 23;  
  labelSize = 10;  
  ticksLabelSize = 8;  
}
```

```
(* Define Chromosome Colors *)
```

```
colorDefinitions = Chop[Drop[Flatten[Table[{ColorConvert[Hue[a / 24], RGBColor],  
  ColorConvert[Hue[(a + 12) / 24], RGBColor]}, {a, 10, -1, -1}], {24}]]];
```

```
(* Read Segmentation Data *)
```

```
stream = path <> "251_Segments.txt";  
segments = Drop[Import[stream, "Table"], 1];  
segmentsSplit = SplitBy[segments, First];
```

```
(* Match Tumor and Normal Probes to Chromosome Location *)
```

```
tumorChromosomeDefinitions = Table[Position[tumorProbeLoc, a][[All, 1]], {a, 23}];  
tumorChromosomeBounds = Table[{  
  Min[tumorChromosomeDefinitions[[a]]], Max[tumorChromosomeDefinitions[[a]]], {a, 23}}];  
normalChromosomeDefinitions = Table[Position[normalProbeLoc, a][[All, 1]], {a, 23}];  
normalChromosomeBounds = Table[{  
  Min[normalChromosomeDefinitions[[a]]], Max[normalChromosomeDefinitions[[a]]], {a, 23}}];
```

```
(* Define Segments Line Display *)
```

```
segmentsLines[segmentsSplit_, arrayletRange_, dotsScaleFactor_, dotsOffset_] := {  
  patternPos = Position[segmentsSplit[[All, 1, 1]], pattern][[1]];  
  Graphics[Table[  
    Line[{{segmentsSplit[[patternPos, a, 6]][[1]],  
      Clip[segmentsSplit[[patternPos, a, 9]][[1]], {arrayletRange[[1]], arrayletRange[[2]]} *  
        dotsScaleFactor + dotsOffset}, {segmentsSplit[[patternPos, a, 7]][[1]],  
      Clip[segmentsSplit[[patternPos, a, 9]][[1]], {arrayletRange[[1]], arrayletRange[[2]]} *  
        dotsScaleFactor + dotsOffset}}],  
    {a, 1, Dimensions[segmentsSplit[[patternPos]][[1]][[1]]}}]  
}
```

```
(* Define Arraylet Plot Display *)
```

```
arrayletsFigure[chromosomes_, dotsScaleFactor_, arraylet_,  
  chromosomeDefinitions_, numChromosomes_, arrayletRange_, dotsOffset_,  
  genes_, chromosomeBounds_, range_, sample_, arrayletsXLabels_, format_] := {  
  Table[  
    Graphics[{colorDefinitions[[a]], PointSize[1/dotsScaleFactor],  
      Point[Table[{c++, arraylet[[chromosomeDefinitions[[a, b]]]],  
        {b, Dimensions[chromosomeDefinitions[[a]]][[1]]}], {a, numChromosomes}],  
    Graphics[Line[{{0, arrayletRange[[1]] * dotsScaleFactor + dotsOffset},  
      {genes, arrayletRange[[1]] * dotsScaleFactor + dotsOffset},  
      {genes, arrayletRange[[2]] * dotsScaleFactor + dotsOffset},  
      {0, arrayletRange[[2]] * dotsScaleFactor + dotsOffset},  
      {0, arrayletRange[[1]] * dotsScaleFactor + dotsOffset}]],  
    Graphics[{Dashed, Line[{{0, dotsOffset}, {genes, dotsOffset}]}],  
    Table[Graphics[{  
      Text[Style[chromosomes[[a]], ticksLabelSize], {chromosomeBounds[[a, 1]],  
        (arrayletRange[[2]] + .0005) * dotsScaleFactor + dotsOffset}, {0, -1}],  
      Line[{{chromosomeBounds[[a, 1]], arrayletRange[[2]] * dotsScaleFactor + dotsOffset},  
        {chromosomeBounds[[a, 1]], (arrayletRange[[2]] + .0003) * dotsScaleFactor + dotsOffset}],  
      Text[Style[chromosomes[[a]], ticksLabelSize],  
        {chromosomeBounds[[a, 1]], range[[1, 2]] - 5}, {0, 1}],  
      Line[{{chromosomeBounds[[a, 1]], range[[1, 2]] + 0},  
        {chromosomeBounds[[a, 1]], range[[1, 2]] - 4}], {a, 1, numChromosomes}],  
    Graphics[{Text[Style[ColumnForm[{"Relative DNA", "Copy Number"}, Center], labelSize],  
      {-genes * .045, yOffset}, {0, 0}, {0, 1}],  
      If[Length[format] == 1,  
        Text[Style["(d) " <> sample <> " Arraylet " <> ToString[pattern], labelSize],  
          {genes / 2, (arrayletRange[[2]] + .0045) * dotsScaleFactor + dotsOffset}, {0, 0}],  
        Text[Style["(a) " <> sample <> " Arraylet " <> ToString[pattern], labelSize],  
          {genes / 2, (arrayletRange[[2]] + .0045) * dotsScaleFactor + dotsOffset}, {0, 0}],  
        Text[Style["Chromosomes", labelSize], {genes / 2, -18}, {0, 1}],  
        If[Length[format] == 1,  
          Text[Style["(f) " <> sample <> " Relative DNA Copy Number", labelSize], {genes / 2, -35}, {0, 1}],  
          Text[  
            Style["(c) " <> sample <> " Relative DNA Copy Number", labelSize], {genes / 2, -35}, {0, 1}]]],  
    Table[Graphics[{Text[Style[arrayletsXLabels[[a]], ticksLabelSize],  
      {-genes * .003, ToExpression[arrayletsXLabels[[a]] * dotsScaleFactor + dotsOffset}, {1, 0}],  
      {a, 1, Dimensions[arrayletsXLabels][[1]]}]  
    ]  
  }  
}
```

```
(* Define Genes Arrow Display *)
```

```
arrowLabels[genes_, arraylet_, lociList_, labelSize_] := {  
  Table[  
    Graphics[{Arrowheads[.006], Arrow[  
      {.02 * genes * Sin[lociList[[a, 4]] Degree] + lociList[[a, 2]],  
      17 * Cos[lociList[[a, 4]] Degree] + arraylet[[lociList[[a, 2]]]],  
      {lociList[[a, 2]], arraylet[[lociList[[a, 2]]]}},  
      {0, .002 * genes * Sin[lociList[[a, 4]] Degree]^2 + 4 * Cos[lociList[[a, 4]] Degree]^2}],  
    Graphics[{lociList[[a, 3]], Style[Text[lociList[[a, 1]],  
      {.02 * genes * Sin[lociList[[a, 4]] Degree] + lociList[[a, 2]],  
      19 * Cos[lociList[[a, 4]] Degree] + arraylet[[lociList[[a, 2]]]],  
      {-Sin[lociList[[a, 4]] Degree], -Cos[lociList[[a, 4]] Degree}],  
      labelSize}], {a, Dimensions[lociList][[1]]}]  
  }  
}
```

```
(* Define Genes *)
```

```
lociList = {{ "MDM4", 14 432, Black, 315}, {"AKT3", 17 428, Black, 45}, {"EGFR", 92 730, Black, 250},  
  {"MET", 97 150, Black, 0}, {"METTL2B", 98 060, Red, 75}, {"CDKN2A/B", 112 713, Black, 270},  
  {"PTEN", 125 990, Black, 100}, {"CDK4", 143 785, Black, 320}, {"MDM2", 144 525, Black, 90},  
  {"KDM5A", 139 012, Red, 330}, {"TLK2/METTL2A", 182 766, Red, 330}, {"CCNE1", 192 313, Red, 45}};
```

```
(* Define Probelet Plot Display *)
```

```
probeletFigure[sortProbeletAnnotationColors_, sortProbelets_, xScaleFactor_,  
  range_, cutoff_, probeletXLabels_, ticksLabelSize_, genes_, pattern_, format_] := {  
  sortPoints = Table[{sortProbelets[[a]] * xScaleFactor - xOffset, d++},  
    {a, Dimensions[sortProbelets][[1]]}];  
  redPos = Flatten[Position[sortProbeletAnnotationColors, Red]];  
  bluePos = Flatten[Position[sortProbeletAnnotationColors, Blue]];  
  grayPos = Flatten[Complement[Range[Length[sortProbelets]], bluePos, redPos]];  
  Graphics[{  
    Table[{sortProbeletAnnotationColors[[a]], PointSize[.003], Point[sortPoints[[a]]]},  
      {a, Join[grayPos, bluePos, redPos]}],  
    EdgeForm[Black], Opacity[0], Rectangle[{range[[1, 1]] - xOffset, range[[1, 2]]},  
      {range[[2, 1]] - xOffset, range[[2, 2]] + 1}],  
    Opacity[1], Dashed, Black,  
    Table[Line[{range[[1, 1]] - xOffset, .5 + cutoff[[1, a]]},  
      {range[[2, 1]] - xOffset, .5 + cutoff[[1, a]]}], {a, Dimensions[cutoff[[1]]][[1]}],  
    Table[Line[{-xOffset + cutoff[[2, a]] * xScaleFactor, range[[1, 2]]}, {-xOffset +  
      cutoff[[2, a]] * xScaleFactor, range[[2, 2]]}], {a, Dimensions[cutoff[[2]]][[1]}],  
    Table[{  
      Text[Style[Chop[probeletXLabels[[a]]], ticksLabelSize],  
        {probeletXLabels[[a]] * xScaleFactor - xOffset, range[[1, 2]] - 5}, {0, 1}],  
      Line[{probeletXLabels[[a]] * xScaleFactor - xOffset, range[[1, 2]] - 4},  
        {probeletXLabels[[a]] * xScaleFactor - xOffset, range[[1, 2]] + 0}],  
      {a, 1, Dimensions[probeletXLabels][[1]]}],  
    Text[Style["Relative DNA", labelSize], {Mean[range[[All, 1]]] - xOffset - 500, -18}, {0, 1}],  
    Text[Style["Copy Number", labelSize], {Mean[range[[All, 1]]] - xOffset, -35}, {0, 1}],  
    Table[{  
      Text[Style[ylabels[[a]], ticksLabelSize],  
        {range[[1, 1]] - genes * .005 - xOffset, ylabels[[a]]}, {1, 0}],  
      Line[{range[[1, 1]] - genes * .003 - xOffset, ylabels[[a]]},  
        {range[[1, 1]] - xOffset, ylabels[[a]]}],  
      Text[Style[ylabels[[a]], ticksLabelSize], {genes * 1.003, ylabels[[a]]}, {-1, 0}],  
      Line[{genes, ylabels[[a]]}, {genes * 1.003, ylabels[[a]]}],  
      {a, 1, Dimensions[ylabels][[1]]}],  
    Text[Style["Patients", labelSize], {genes * 1.04, Mean[range[[All, 2]]]}, {0, 0}, {0, 1}],  
    If[Length[format] == 1, Style[Text["(e) Probelet " <> ToString[pattern],  
      {range[[1, 1]] - xOffset - genes * .035, Mean[range[[All, 2]]]}, {0, -1}, {0, 1}], labelSize],  
      Style[Text["(b) Probelet " <> ToString[pattern], {range[[1, 1]] - xOffset - genes * .035,  
        Mean[range[[All, 2]]]}, {0, -1}, {0, 1}], labelSize]]]  
  }
```

```
(* Define Probelet and Arraylet Display *)
```

```
compositeFigure[pattern_, sample_, probeletAnnotationColors_,  
  raster_, lociList_, cutoff_, arrayletRange_, probeletXLabels_, format_] := {  
  chromosomes = Join[Range[1, 22], {"X"}];  
  sortData[probeletAnnotationColors, raster, sample];  
  figureVariables[arraylet, sortProbelets, arrayletRange];  
  arraylet = Clip[arraylet, arrayletRange] * dotsScaleFactor + dotsOffset;  
  gRaster = Graphics[Raster[sortRaster, {{0, .5}, {genes, 251.5}}, ColorFunction -> RGBColor];  
  gArraylet =  
    arrayletsFigure[chromosomes, dotsScaleFactor, arraylet, chromosomeDefinitions, numChromosomes,  
      arrayletRange, dotsOffset, genes, chromosomeBounds, range, sample, arrayletsXLabels, format];  
  gSegments = segmentsLines[segmentsSplit, arrayletRange, dotsScaleFactor, dotsOffset];  
  gArrows = arrowLabels[genes, arraylet, lociList, labelSize];  
  gProbelets = probeletFigure[sortProbeletAnnotationColors, sortProbelets,  
    xScaleFactor, range, cutoff, probeletXLabels, ticksLabelSize, genes, pattern, format];  
  Show[{gRaster, gArraylet, gSegments, gArrows, gProbelets},  
    AspectRatio -> .4,  
    ImageSize -> 1000,  
    BaseStyle -> {FontFamily -> "Courier"},  
    PlotRange -> {All, {-50, 420}}]  
  }
```

```
(* Read TCGA Patient Annotations *)
```

```
stream = path <> "251_Patients.txt";  
arrayAnnotations = Import[stream, "Table"];  
headers = arrayAnnotations[[1]];  
arrayAnnotations = Sort[Drop[Import[stream, "List"], 1]];  
arrayAnnotations =  
  Table[StringSplit[arrayAnnotations[[a]], "\t"], {a, 1, Dimensions[arrayAnnotations] [[1]]};  
arrayAnnotations[[All, 12 ;; 20]] = ToExpression[arrayAnnotations[[All, 12 ;; 20]]];  
arrayAnnotations[[All, 2 ;; 4]] = ToExpression[arrayAnnotations[[All, 2 ;; 4]]];  
{rows, columns} = Dimensions[arrayAnnotations];
```

```
(* Create Second Probelet and Tumor Arraylet Display *)
```

```
pattern = 2;  
colors = Table[Blue, {arrays}];  
colors[[Ordering[probelets[[pattern]]][[2 ;; 24]]]] = Red;  
colors[[Ordering[probelets[[pattern]]][[1]]]] = RGBColor[0.75, 0.75, 0.75];  
condition = "Tumor";  
  
t2 = compositeFigure[pattern, condition, colors, rawTumorRaster,  
  lociList, {{25.5}, {-0.02, 0.02}}, {-0.01, 0.01}, {-0.02, 0.02, 0.1}, {}][[1]];
```

```
(* Create 246th Probelet and Normal Arraylet Display *)
```

```
genderColumn = Flatten[Position[headers, "copy-number.gender"]];  
colors = ReplaceAll[arrayAnnotations[[All, genderColumn[[1]]]], {"MALE" → Blue, "FEMALE" → Red}];  
pattern = 246;  
condition = "Normal";  
  
n246 = compositeFigure[pattern, condition, colors,  
  rasterContrast * rawNormalRaster, {}, {{165.5}, {0}}, {-0.005, 0.015}, {0, 0.05, 0.1}, {1}][[1]];
```

(\* Create Second and 246th Probelets and Corresponding Arraylets Display \*)

```
fig2 = GraphicsGrid[{{t2}, {n246}}, Spacings -> 10, ImageSize -> 1000]
```

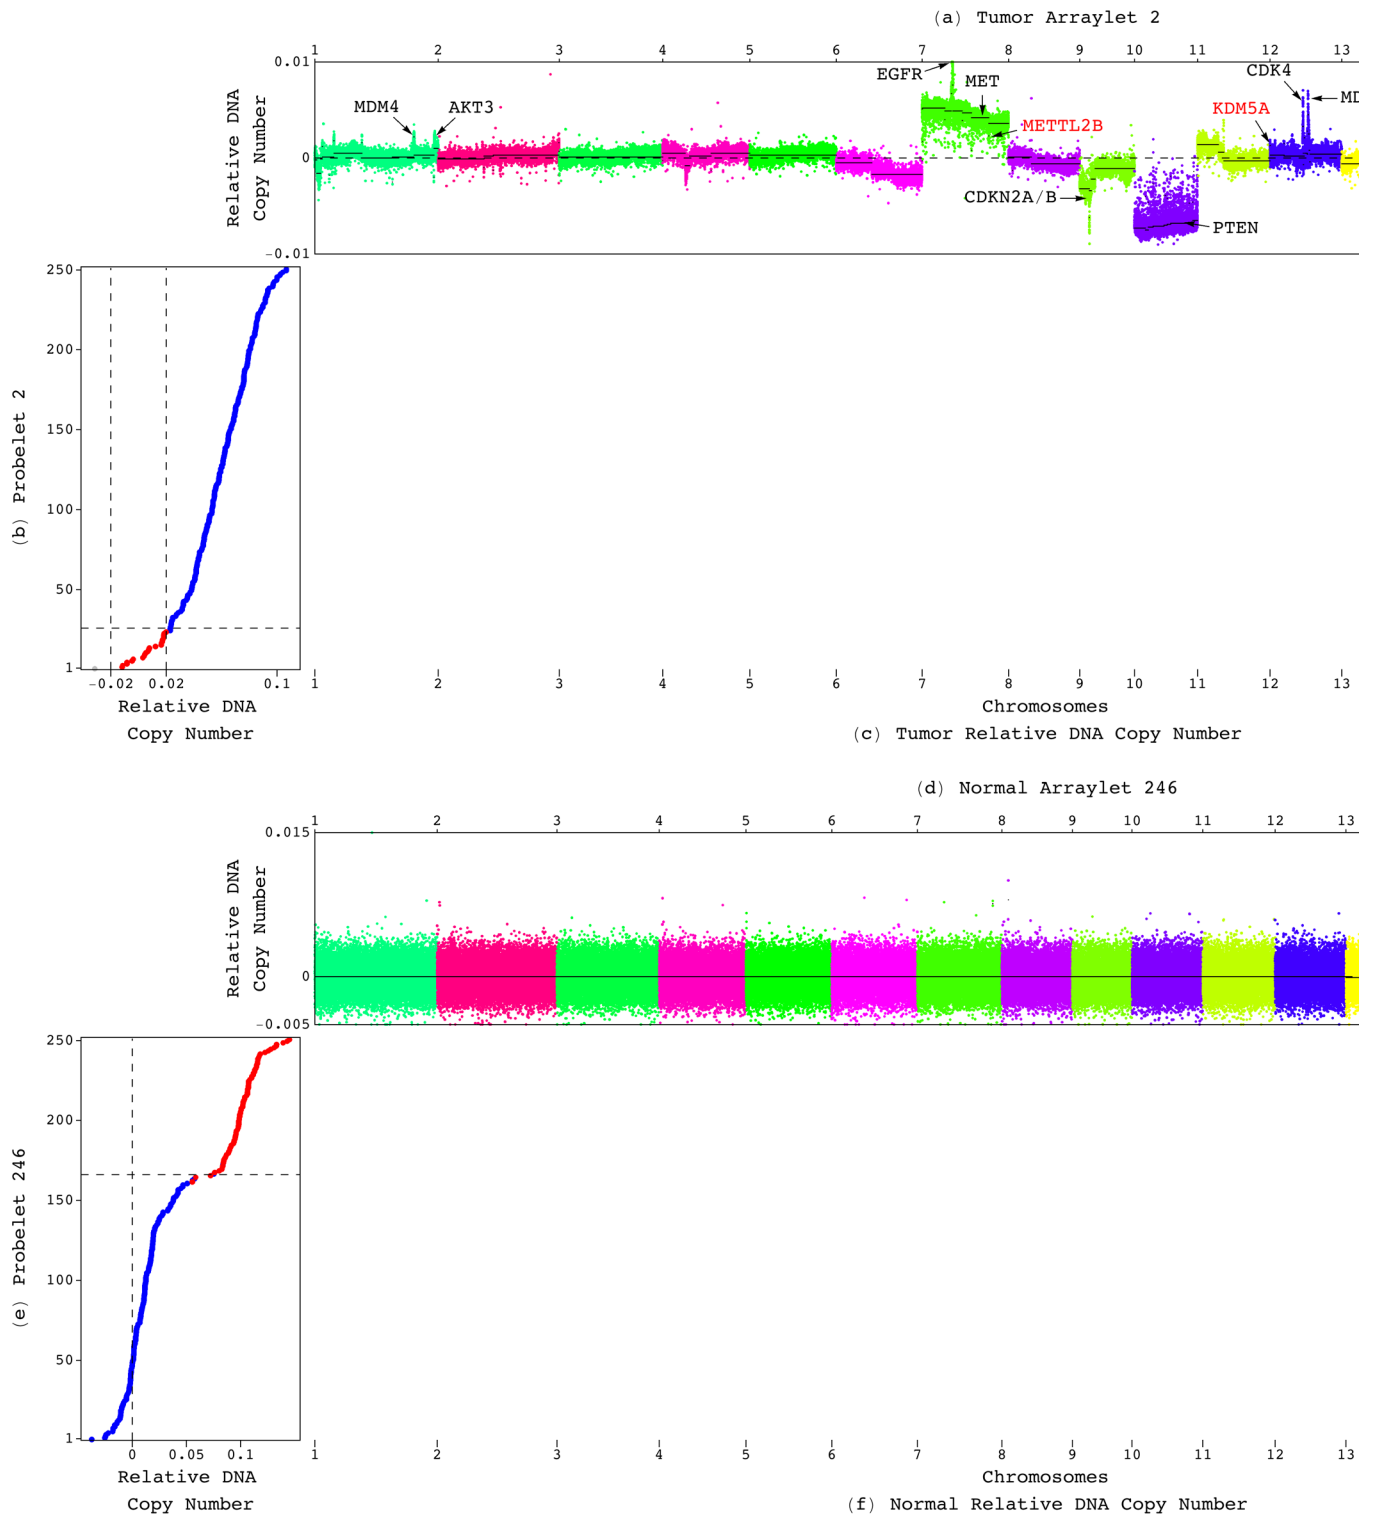

```
Export[path <> "Figure_2.pdf", fig2, "PDF", ImageSize -> 1000, ImageResolution -> resolution];
```

```

(* Create First Probelet and Tumor Arraylet Display *)

tumorCenterColumn = Flatten[Position[headers, "tumor.center"]];
pattern = 1;
condition = "Tumor";
colors = ReplaceAll[arrayAnnotations[[All, tumorCenterColumn[[1]]],
  {"HMS" → Red, "Both" → RGBColor[0.75, 0.75, 0.75], "MSKCC" → Blue}];

sFig2 = compositeFigure[pattern, condition, colors,
  rawTumorRaster, {}, {{68}, {0}}, {-0.01, .01}, {-0.2, -0.1, 0, 0.1}, {}][[1]];

Export[path <> "Supplementary_Figure_2.pdf",
  sFig2, "PDF", ImageSize → 1000, ImageResolution → resolution];

(* Create 247th Probelet and Normal Arraylet Display *)

normalDateColumn = Flatten[Position[headers, "normal.scan.date"]];
colors = Table[RGBColor[.75, .75, .75], {251}];
bottom = Flatten[Position[arrayAnnotations[[All, normalDateColumn[[1]]], "7.22.2009"]];
top = Flatten[Position[arrayAnnotations[[All, normalDateColumn[[1]]], "10.8.2009"]];
colors[[bottom]] = Red;
colors[[top]] = Blue;
pattern = 247;
condition = "Normal";

sFig3 = compositeFigure[pattern, condition, colors, rasterContrast * rawNormalRaster,
  {}, {{38, 200}, {0}}, {-0.01, .01}, {-0.2, -0.1, 0, 0.1}, {}][[1]];

Export[path <> "Supplementary_Figure_3.pdf",
  sFig3, "PDF", ImageSize → 1000, ImageResolution → resolution];

(* Create 248th Probelet and Normal Arraylet Display *)

normalBatchScannerColumn = Flatten[Position[headers, "normal.batch/scanner"]];
colors = Table[Blue, {251}];
batchScanner =
  Flatten[Position[arrayAnnotations[[All, normalBatchScannerColumn[[1]]], "HMS_8/2331"]];
colors[[batchScanner]] = Red;
pattern = 248;
condition = "Normal";

sFig4 = compositeFigure[pattern, condition, colors,
  rasterContrast * rawNormalRaster, {}, {{232}, {0}}, {-0.01, .01}, {-0.1, 0, 0.1}, {}][[1]];

Export[path <> "Supplementary_Figure_4.pdf",
  sFig4, "PDF", ImageSize → 1000, ImageResolution → resolution];

(* Create 249th Probelet and Normal Arraylet Display *)

normalBatchScannerColumn = Flatten[Position[headers, "normal.batch/scanner"]];
colors = Table[Blue, {251}];
batchScanner =
  Flatten[Position[arrayAnnotations[[All, normalBatchScannerColumn[[1]]], "HMS_8/2331"]];
colors[[batchScanner]] = Red;
pattern = 249;
condition = "Normal";

sFig5 = compositeFigure[pattern, condition, colors, rasterContrast * rawNormalRaster, {},
  {{22}, {0}}, {-0.01, .01}, {-0.1, 0, 0.1}, {}][[1]];

Export[path <> "Supplementary_Figure_5.pdf", sFig5, "PDF", ImageSize → 1000,
  ImageResolution → resolution];

```



```
(* Create 250th Probelet and Normal Arraylet Display *)
```

```
normalDateColumn = Flatten[Position[headers, "normal.scan.date"]];
colors = Table[RGBColor[.75, .75, .75], {251}];
bottom = Flatten[Position[arrayAnnotations[All, normalDateColumn[[1]]], "7.22.2009"]];
colors[[bottom]] = Blue;
top = Flatten[Position[arrayAnnotations[All, normalDateColumn[[1]]], "4.18.2007"]];
colors[[top]] = Red;
pattern = 250;
condition = "Normal";

sFig6 = compositeFigure[pattern, condition, colors, rasterContrast * rawNormalRaster, {},
  {{25, 225}, {0}}, {-0.01, .01}, {-0.1, 0, 0.1}, {}][[1]];

Export[path <> "Supplementary_Figure_6.pdf", sFig6, "PDF", ImageSize -> 1000,
  ImageResolution -> resolution];
```

```
(* Create 251st Probelet and Normal Arraylet Display *)
```

```
normalCenterColumn = Flatten[Position[headers, "normal.center"]];
colors = ReplaceAll[arrayAnnotations[All, normalCenterColumn[[1]]],
  {"HMS" -> Red, "Both" -> RGBColor[.75, 0.75, 0.75], "MSKCC" -> Blue};
pattern = 251;
condition = "Normal";

sFig7 = compositeFigure[pattern, condition, colors, rasterContrast * rawNormalRaster, {},
  {{112}, {0}}, {-0.01, .01}, {-0.1, 0, 0.05}, {}][[1]];

Export[path <> "Supplementary_Figure_7.pdf",
  sFig7, "PDF", ImageSize -> 1000, ImageResolution -> resolution];
```

```
(* Create Tumor and Normal Generalized Fractions Bar Chart Displays *)
```

```
distances = Table[N[ArcTan[d1[[a, a]] / d2[[a, a]]] - Pi / 4], {a, 1, arrays}];
ylabels = {1, 50, 100, 150, 200, 250};

fractions1 = Table[d1^2[[a, a]], {a, 1, arrays}];
totalFractions1 = Total[fractions1];
fractions1 = fractions1 / totalFractions1;

fractions2 = Table[d2^2[[a, a]], {a, 1, arrays}];
totalFractions2 = Total[fractions2];
fractions2 = fractions2 / totalFractions2;

entropy1 = -N[Sum[fractions1[[a]] * Log[fractions1[[a]]], {a, 1, arrays}] / Log[arrays];
entropy1 = Round[entropy1, 0.01];

arrayNum = 10;
ylabels = Range[arrayNum];
gridx = {0, 0.06, 0.12, 0.18, 0.24};
framex = {"0", "0.06", "0.12", "0.18", "0.24"};
framex = Table[{gridx[[a]], Style[Rotate[framex[[a]], Pi / 2]}], {a, 1, 5}];
gridx = Table[{gridx[[a]], RGBColor[0, 0, 0]}, {a, 1, 5}];
framey =
  Table[{arrayNum - ylabels[[a]] + 1, " " <> ToString[Reverse[Ordering[fractions1, -arrayNum]][[a]]],
    {a, 1, Dimensions[ylabels][[1]]}];
labelx = ColumnForm[{"(a) Tumor Generalized Fraction", "d1 = " <> ToString[entropy1]}, Center];
labely = "Probelets";
```

```

barsFractions1 = Show[BarChart[Reverse[Sort[fractions1, Greater][[1 ;; arrayNum]]], BarOrigin -> Left,
  ChartStyle -> Red, ChartBaseStyle -> EdgeForm[Thin], AspectRatio -> 1, Ticks -> None,
  ImageSize -> 250],
  PlotRange -> {{0.0047, 0.24}, {0.5, arrayNum + 0.5}},
  Frame -> True,
  FrameTicks -> {None, framey, framex, None},
  FrameLabel -> {None, labely, labelx, None},
  GridLines -> {Drop[Drop[gridx, {5}], {1}], None},
  BaseStyle -> {FontFamily -> "Courier", FontSize -> 10}
];

entropy2 = -N[Sum[fractions2[[a]] * Log[fractions2[[a]]], {a, 1, arrays}] / Log[arrays];
entropy2 = Round[entropy2, 0.01];

arrayNum = 10;
ylabels = Range[arrayNum];
gridx = {0, 0.1, 0.2, 0.3, 0.4};
framex = {"0 ", "0.1 ", "0.2 ", "0.3 ", "0.4 "};
framex = Table[{gridx[[a]], Style[Rotate[framex[[a]], Pi / 2]}], {a, 1, Length[framex]};
gridx = Table[{gridx[[a]], RGBColor[0, 0, 0]}], {a, 1, Length[gridx]};
framey = Table[{arrayNum - ylabels[[a]] + 1, Reverse[Ordering[fractions2, -arrayNum][[a]]],
  {a, 1, Dimensions[ylabels][[1]]}];
labelx = ColumnForm[{"(b) Normal Generalized Fraction", "d2 = " <> ToString[entropy2]}, Center];
labely = " ";

barsFractions2 = Show[BarChart[Reverse[Sort[fractions2, Greater][[1 ;; arrayNum]]], BarOrigin -> Left,
  ChartStyle -> Red, ChartBaseStyle -> EdgeForm[Thin], AspectRatio -> 1, Ticks -> None,
  ImageSize -> 250],
  PlotRange -> {{0.008, 0.4}, {0.5, arrayNum + 0.5}},
  Frame -> True,
  FrameTicks -> {None, framey, framex, None},
  FrameLabel -> {None, labely, labelx, None},
  GridLines -> {Drop[Drop[gridx, -1], 1], None},
  BaseStyle -> {FontFamily -> "Courier", FontSize -> 10}
];

sFig1 = GraphicsGrid[{{barsFractions1, barsFractions2}}, ImageSize -> 500, Spacings -> -25]

```

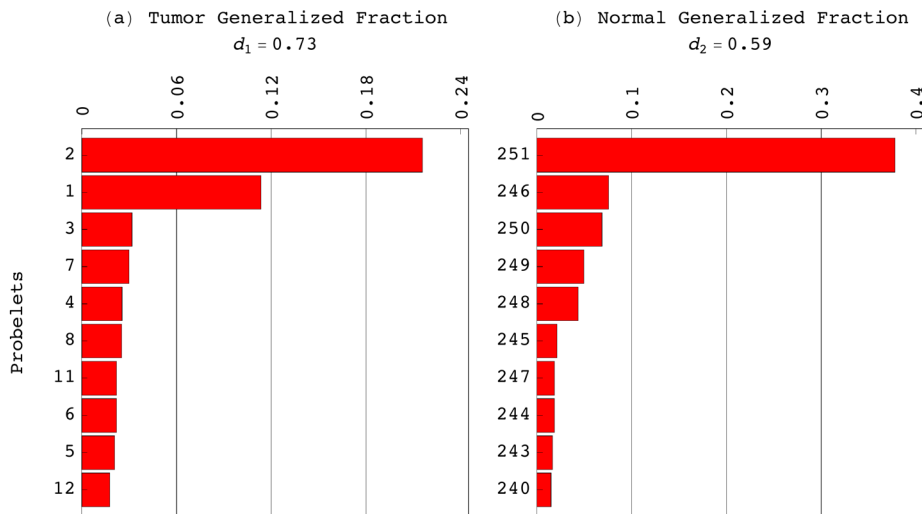

```

Export[path <> "Supplementary_Figure_1.pdf",
  sFig1, "PDF", ImageSize -> 500, ImageResolution -> resolution];

```

(\* Create Angular Distances Bar Chart Display \*)

```
arrayNum = 251;
ylabels = {1, 50, 100, 150, 200, 250};
gridx = {- $\pi/4$ , - $\pi/6$ , 0,  $2\pi/9$ ,  $\pi/4$ };
framex = {"- $\pi/4$ ", "- $\pi/6$ ", "0", " $2\pi/9$ ", " $\pi/4$ "};
framex = Table[{gridx[[a]], Style[Rotate[framex[[a]], Pi/2]]}, {a, 1, 5}];
gridx = Table[{gridx[[a]], RGBColor[0, 0, 0]}, {a, 1, 5}];
framey = Table[{arrayNum - ylabels[[a]], ylabels[[a]]}, {a, 1, Dimensions[ylabels][[1]]};
labelx = ColumnForm["Angular Distance", Center];
labely = "Probelets";

barsFull = Show[BarChart[Reverse[distances],
  BarOrigin -> Left,
  ChartStyle -> Red,
  ChartBaseStyle -> EdgeForm[None],
  Axes -> False,
  PlotRange -> {{- $\pi/4 * 1.0001$ ,  $\pi/4 * 1.0001$ }, {0.5, arrayNum + 0.5}},
  AspectRatio -> 1, ImageSize -> 300],
  Frame -> True,
  FrameTicks -> {None, framey, framex, None},
  FrameLabel -> {None, labely, labelx, None},
  GridLines -> {Drop[Drop[gridx, {5}], {1}], None},
  BaseStyle -> {FontFamily -> "Courier", FontSize -> 10}];
```

(\* Display GSVD of Patient-Matched Tumor and Normal aCGH Profiles \*)

(\* Create Tumor and Normal Arraylets Raster Displays \*)

```
binnedArrayletTumor =
  Table[Mean[tumorArraylets[[a ;; a + step - 1]]], {a, 1, Floor[tumorProbes, step], step}];
{binnedRows, arrays} = Dimensions[binnedArrayletTumor];
raster = Table[adjustedValue = binnedArrayletTumor[[a, b]];
  If[adjustedValue > 0, {adjustedValue, 0, 0}, {0, adjustedValue, 0}],
  {a, 1, binnedRows}, {b, 1, arrays}];
raster[[All, All, 2]] = -raster[[All, All, 2]];
tumorArrayletsRaster = raster;

binnedArrayletNormal =
  Table[Mean[normalArraylets[[a ;; a + step - 1]]], {a, 1, Floor[normalProbes, step], step}];
{binnedRows, arrays} = Dimensions[binnedArrayletNormal];
raster = Table[adjustedValue = binnedArrayletNormal[[a, b]];
  If[adjustedValue > 0, {adjustedValue, 0, 0}, {0, adjustedValue, 0}],
  {a, 1, binnedRows}, {b, 1, arrays}];
raster[[All, All, 2]] = -raster[[All, All, 2]];
normalArrayletsRaster = raster;
```

(\* Create Probelets Raster Display \*)

```
arrayNum = 10;
numFractions = Dimensions[probelets][[1]];
fractList = Join[Range[1, arrayNum], Range[numFractions - arrayNum + 1, numFractions]];
contrast = 2;
fractions = Diagonal[d1] / Max[d1];
numFractionsDisplay = Dimensions[fractList][[1]];
d1Raster = Table[{0, 0, 0}, {a, 1, numFractionsDisplay}, {b, numFractionsDisplay}];
Do[d1Raster[[a, a, 1]] = contrast * fractions[[fractList[[a]]], {a, 1, numFractionsDisplay}];
fractions = Diagonal[d2] / Max[d2];
numFractionsDisplay = Dimensions[fractList][[1]];
d2Raster = Table[{0, 0, 0}, {a, 1, numFractionsDisplay}, {b, numFractionsDisplay}];
Do[d2Raster[[a, a, 1]] = contrast * fractions[[fractList[[a]]], {a, 1, numFractionsDisplay}];
probeletsRaster = Table[adjustedValue = probelets[[a, b]];
  If[adjustedValue > 0, {adjustedValue, 0, 0}, {0, adjustedValue, 0}],
  {a, 1, Dimensions[probelets][[1]]}, {b, 1, Dimensions[probelets][[2]]}];
probeletsRaster[[All, All, 2]] = -probeletsRaster[[All, All, 2]];
```

```
(* Define GSVD Display *)
```

```
genes1 = 680;  
genes2 = 840;  
yOffset = 126;  
totalArrays = 251;  
arrays = yOffset;  
space = 0;  
xOffset = 0;  
labelMargin = 0.1;  
labelMarginVertical = 0.45;  
labelMarginHorizontal = 0.3;  
labelSize = 10;  
ticksLabelSize = 8;  
chromosomes = Join[Range[1, 22], {"X"}];  
arrayNum = 10;  
numChromosomes = 23;  
ticks = {1, 50, 100, 150, 200, 250};  
ticksShort = {{1, 0.5 / (2 * arrayNum)},  
  {5, 4.5 / (2 * arrayNum)}, {246, (245.5 - totalArrays + 2 * arrayNum) / (2 * arrayNum)},  
  {250, (249.5 - totalArrays + 2 * arrayNum) / (2 * arrayNum)}};
```

```
(* Define Tumor and Normal Datasets Display *)
```

```
dataTensor = {  
  Graphics[{Red, Raster[Reverse[2 * rawNormalRaster[[All, Ordering[probelets[[2]]]]],  
    {{0 + xOffset + space, genes2 / 2 - genes1}, {arrays + xOffset, genes2 / 2}}]}],  
  Graphics[{Blue, Raster[Reverse[2 * rawTumorRaster[[All, Ordering[probelets[[2]]]]],  
    {{arrays + xOffset + space, -genes2 / 2 + yOffset},  
    {2 * arrays + xOffset + space, genes2 / 2 + yOffset}}]}],  
  Graphics[Text[StyleForm["!\(\*TagBox[SubscriptBox[\\"D\", \"normal\"], DisplayForm]\)",  
    FontSize → labelSize], {-arrays * .25, genes2 * .5 + arrays * .25}, {0, -1}],  
  Graphics[Text[StyleForm["!\(\*TagBox[SubscriptBox[\\"D\", \"tumor\"], DisplayForm]\)",  
    FontSize → labelSize], {arrays * .75, genes2 * .5 + arrays * .25 + yOffset}, {0, -1}],  
  Graphics[Line[{{-arrays * .15, genes2 * .5 + arrays * .15}, {0, genes2 / 2}}],  
  Graphics[Line[{{arrays * .85, genes2 * .5 + arrays * .15 + yOffset}, {arrays, genes2 / 2 + yOffset}}],  
  Graphics[Line[{{0, genes2 / 2}, {arrays, genes2 / 2 + yOffset}}],  
  Graphics[{White, Dashed, Line[{{arrays, genes2 / 2}, {2 * arrays, genes2 / 2 + yOffset}}]}],  
  Graphics[  
    Style[Text["Tissue Types", {arrays * 0 - 10, genes2 * .5 + arrays}, {0, 0}, {1, 1}], labelSize],  
  Table[Graphics[{Text[Style[ticks[[a]], ticksLabelSize],  
    {xOffset + arrays + arrays * ticks[[a]] / 251,  
    genes2 / 2 + yOffset + arrays * labelMargin}, {-1, 0}, {0, 1}],  
    Line[{{xOffset + arrays + arrays * ticks[[a]] / 251, genes2 / 2 + yOffset},  
    {xOffset + arrays + arrays * ticks[[a]] / 251, genes2 / 2 + yOffset + 8}}],  
  ], {a, Length[ticks]}],  
  Table[Graphics[{Text[Style[chromosomes[[a]], ticksLabelSize],  
    {xOffset - arrays * labelMargin,  
    genes2 / 2 - normalChromosomeBounds[[a, 1]] * (genes1 / normalProbes)}, {1, 0}, {1, 0}],  
    Line[{{xOffset - 8, genes2 / 2 - normalChromosomeBounds[[a, 1]] * (genes1 / normalProbes)},  
    {xOffset, genes2 / 2 - normalChromosomeBounds[[a, 1]] * (genes1 / normalProbes)}],  
    Text[Style[chromosomes[[a]], ticksLabelSize], {xOffset + arrays * (2 + labelMargin),  
    genes2 / 2 + yOffset - tumorChromosomeBounds[[a, 1]] * (genes2 / tumorProbes)}, {-1, 0}, {1, 0}],  
    Line[{{xOffset + 2 * arrays, genes2 / 2 + yOffset - tumorChromosomeBounds[[a, 1]] *  
    (genes2 / tumorProbes)},  
    {xOffset + 2 * arrays + 8, genes2 / 2 + yOffset -  
    tumorChromosomeBounds[[a, 1]] * (genes2 / tumorProbes)}]}], {a, 1, numChromosomes}],  
  Graphics[Text["Arrays", {arrays * 1.5, genes2 * .5 + yOffset + arrays * labelMarginVertical}],  
  Graphics[Text["Normal Probes",  
    {-arrays * labelMarginHorizontal, genes2 / 2 - arrays * 0.7}, {0, 0}, {0, 1}],  
  Graphics[Text["Tumor Probes", {2 * arrays + xOffset + arrays * labelMarginHorizontal,  
    genes2 / 2 + yOffset - arrays * 0.7}, {0, 0}, {0, 1}],  
  Graphics[{White, Thin, Line[{{arrays, -genes2 / 2 + yOffset}, {arrays, genes2 / 2 + yOffset}}]}];
```

```

Dimensions[rawNormalRaster];
normalArrayletsRasterShort = Drop[normalArrayletsRaster, None, {arrayNum + 1, 251 - arrayNum}];
Dimensions[normalArrayletsRasterShort];
tumorArrayletsRasterShort = Drop[tumorArrayletsRaster, None, {arrayNum + 1, 251 - arrayNum}];
Dimensions[tumorArrayletsRasterShort];

(* Define Tumor and Normal Arraylets Display *)

xOffset = 3.5 * arrays;
arrayletTensor = {
  Graphics[{Red, Raster[Reverse[200 * normalArrayletsRasterShort, {1}],
    {{xOffset, genes2 / 2 - genes1}, {arrays + xOffset, genes2 / 2}}]}],
  Graphics[{Blue, Raster[Reverse[200 * tumorArrayletsRasterShort, {1}], {{arrays + xOffset + space,
    -genes2 / 2 + yOffset}, {2 * arrays + xOffset + space, genes2 / 2 + yOffset}}]}],
  Graphics[Text[StyleForm["!\(\*TagBox[SubscriptBox[\\"U\", \"normal\"], DisplayForm]\)",
    FontSize → labelSize], {-arrays * .25 + xOffset, genes2 * .5 + arrays * .25}, {0, -1}]],
  Graphics[Text[StyleForm["!\(\*TagBox[SubscriptBox[\\"U\", \"tumor\"], DisplayForm]\)",
    FontSize → labelSize], {arrays * .75 + xOffset, genes2 * .5 + arrays * .25 + yOffset}, {0, -1}]],
  Graphics[Line[{{-arrays * .15 + xOffset, genes2 * .5 + arrays * .15}, {0 + xOffset, genes2 / 2}}]],
  Graphics[Line[{{arrays * .85 + xOffset, genes2 * .5 + arrays * .15 + yOffset},
    {arrays + xOffset, genes2 / 2 + yOffset}}]],
  Graphics[Line[{{0 + xOffset, genes2 / 2}, {arrays + xOffset, genes2 / 2 + yOffset}}]],
  Graphics[{White, Dashed, Line[{{arrays + xOffset, genes2 / 2},
    {2 * arrays + xOffset, genes2 / 2 + yOffset}}]}],
  Graphics[Style[
    Text["Tissue Types", {arrays * 0 + xOffset - 10, genes2 * .5 + arrays}, {0, 0}, {1, 1}], labelSize]],
  Table[Graphics[{Text[Style[ticksShort[[a, 1]], ticksLabelSize],
    {xOffset + arrays + arrays * ticksShort[[a, 2]],
    genes2 / 2 + yOffset + arrays * labelMargin}, {-1, 0}, {0, 1}],
    Line[{{xOffset + arrays + arrays * ticksShort[[a, 2]], genes2 / 2 + yOffset},
    {xOffset + arrays + arrays * ticksShort[[a, 2]], genes2 / 2 + yOffset + 8}]]],
    {a, Length[ticksShort]}],
  Graphics[{White, Line[{{arrays / 2 + xOffset, genes2 / 2 - genes1},
    {arrays / 2 + xOffset, genes2 / 2}}]}],
  Graphics[{White, Line[{{arrays * 1.5 + xOffset, -genes2 / 2 + yOffset},
    {arrays * 1.5 + xOffset, genes2 / 2 + yOffset}}]}],
  Table[Graphics[{Text[Style[chromosomes[[a]], ticksLabelSize],
    {xOffset - arrays * labelMargin,
    genes2 / 2 - normalChromosomeBounds[[a, 1]] * (genes1 / normalProbes)}, {1, 0}, {1, 0}],
    Line[{{xOffset - 8, genes2 / 2 - normalChromosomeBounds[[a, 1]] * (genes1 / normalProbes)},
    {xOffset, genes2 / 2 - normalChromosomeBounds[[a, 1]] * (genes1 / normalProbes)}]],
    Text[Style[chromosomes[[a]], ticksLabelSize], {xOffset + arrays * (2 + labelMargin),
    genes2 / 2 + yOffset - tumorChromosomeBounds[[a, 1]] * (genes2 / tumorProbes)}, {-1, 0}, {1, 0}],
    Line[{{xOffset + 2 * arrays, genes2 / 2 + yOffset - tumorChromosomeBounds[[a, 1]] *
    (genes2 / tumorProbes)},
    {xOffset + 2 * arrays + 8, genes2 / 2 + yOffset - tumorChromosomeBounds[[a, 1]] *
    (genes2 / tumorProbes)}}]], {a, 1, numChromosomes}],
  Graphics[Text["Arraylets",
    {arrays * 1.5 + xOffset, genes2 * .5 + yOffset + arrays * labelMarginVertical}]],
  Graphics[Text["Normal Probes ",
    {-arrays * labelMarginHorizontal + xOffset, (genes2 / 2) - arrays * 0.7}, {0, 0}, {0, 1}]],
  Graphics[Text["Tumor Probes", {2 * arrays + xOffset + arrays * labelMarginHorizontal,
    genes2 / 2 + yOffset - arrays * 0.7}, {0, 0}, {0, 1}]],
  Graphics[{White, Thin, Line[{{arrays + xOffset, -genes2 / 2 + yOffset},
    {arrays + xOffset, genes2 / 2 + yOffset}}]}];

```

(\* Define Tumor and Normal Generalized Singular Values Display \*)

```
xOffset = 6.6 * arrays;
coreTensor = {
  Graphics[{Raster[Reverse[d1Raster], {{arrays + xOffset + space, genes2 / 2 + yOffset - arrays},
    {2 * arrays + xOffset + space, genes2 / 2 + yOffset}}]}],
  Graphics[{Raster[Reverse[d2Raster], {{0 + xOffset, genes2 / 2 - arrays},
    {arrays + xOffset, genes2 / 2}}]}],
  Graphics[Text[StyleForm["\\(\(*TagBox[SubscriptBox[\"Σ\", \"normal\"], DisplayForm]\"),
    FontSize → labelSize], {-arrays * .25 + xOffset, genes2 * .5 + arrays * .25}, {0, -1}]],
  Graphics[Text[StyleForm["\\(\(*TagBox[SubscriptBox[\"Σ\", \"tumor\"], DisplayForm]\"),
    FontSize → labelSize], {arrays * .75 + xOffset, genes2 * .5 + arrays * .25 + yOffset}, {0, -1}]],
  Graphics[Line[{{-arrays * .15 + xOffset, genes2 * .5 + arrays * .15}, {0 + xOffset, genes2 / 2}}]],
  Graphics[Line[{{arrays * .85 + xOffset, genes2 * .5 + arrays * .15 + yOffset},
    {arrays + xOffset, genes2 / 2 + yOffset}}]],
  Graphics[Line[{{0 + xOffset, genes2 / 2}, {arrays + xOffset, genes2 / 2 + yOffset}}]],
  Graphics[White, Dashed, Line[{{xOffset + arrays, genes2 / 2},
    {2 * arrays + xOffset, genes2 / 2 + yOffset}}]],
  Graphics[Line[{{arrays + xOffset, genes2 / 2 - arrays}, {2 * arrays + xOffset, genes2 / 2}}]],
  Graphics[Style[
    Text["Tissue Types", {arrays * 0 + xOffset - 10, genes2 * .5 + arrays}, {0, 0}, {1, 1}], labelSize]],
  Table[Graphics[{
    Text[Style[ticksShort[[a, 1]], ticksLabelSize], {xOffset + arrays + arrays * ticksShort[[a, 2]],
      genes2 / 2 + yOffset + arrays * labelMargin}, {-1, 0}, {0, 1}],
    Line[{{xOffset + arrays + arrays * ticksShort[[a, 2]], genes2 / 2 + yOffset},
      {xOffset + arrays + arrays * ticksShort[[a, 2]], genes2 / 2 + yOffset + 8}],
  }], {a, Length[ticksShort]}],
  Table[Graphics[{
    Text[Style[ticksShort[[a, 1]], ticksLabelSize], {arrays * -labelMargin + xOffset,
      genes2 / 2 + yOffset - arrays - arrays * ticksShort[[a, 2]]}, {1, 0}, {1, 0}],
    Line[{{xOffset - 8, genes2 / 2 + yOffset - arrays - arrays * ticksShort[[a, 2]]},
      {xOffset, genes2 / 2 + yOffset - arrays - arrays * ticksShort[[a, 2]]}],
  }], {a, Length[ticksShort]}],
  Graphics[White, Line[{{arrays + xOffset, genes2 / 2 - arrays / 2 + yOffset},
    {arrays * 2 + xOffset, genes2 / 2 - arrays / 2 + yOffset}}]],
  Graphics[White, Line[{{arrays * 1.5 + xOffset, genes2 / 2 - arrays + yOffset},
    {arrays * 1.5 + xOffset, genes2 / 2 + yOffset}}]],
  Graphics[White, Line[{{xOffset, genes2 / 2 - arrays / 2},
    {arrays + xOffset, genes2 / 2 - arrays / 2}}]],
  Graphics[White, Line[{{arrays / 2 + xOffset, genes2 / 2 - arrays},
    {arrays / 2 + xOffset, genes2 / 2}}]],
  Graphics[Text["Probelets",
    {arrays * 1.5 + xOffset, genes2 * .5 + yOffset + arrays * labelMarginVertical}],
  Graphics[Text["Arraylets", {-arrays * 0.45 + xOffset, genes2 * .5 - arrays * .5}, {0, 0}, {0, 1}]]
};
```

```
(* Define Probelets Display *)
```

```
probeletsRasterShort =  
  Drop[probeletsRaster[[All, Ordering[probelets[[2]]]], {arrayNum + 1, 251 - arrayNum}];  
xOffset = 8.3 * arrays;  
probeletsDisplay = {  
  Graphics[{Raster[10 * Reverse[probeletsRasterShort],  
    {{arrays + xOffset, genes2 / 2 - arrays + yOffset}, {2 * arrays + xOffset, genes2 / 2 + yOffset}}]}],  
  Table[Graphics[{  
    Text[Style[ticks[[a]], ticksLabelSize], {xOffset + arrays + arrays * ticks[[a]] / 251,  
      genes2 / 2 + yOffset + arrays * labelMargin}, {-1, 0}, {0, 1}],  
    Line[{{xOffset + arrays + arrays * ticks[[a]] / 251, genes2 / 2 + yOffset},  
      {xOffset + arrays + arrays * ticks[[a]] / 251, genes2 / 2 + yOffset + 8}}]  
  ]], {a, Length[ticks]}],  
  Table[Graphics[{Text[Style[ticksShort[[a, 1]], ticksLabelSize],  
    {arrays * (1 - labelMargin) + xOffset,  
      genes2 / 2 + yOffset - arrays * ticksShort[[a, 2]]}], {1, 0}, {1, 0}],  
    Line[{{arrays + xOffset - 8, genes2 / 2 + yOffset - arrays * ticksShort[[a, 2]]},  
      {arrays + xOffset, genes2 / 2 + yOffset - arrays * ticksShort[[a, 2]]}}]  
  ]], {a, Length[ticksShort]}],  
  Graphics[{White, Line[{{arrays + xOffset, genes2 / 2 - arrays / 2 + yOffset},  
    {arrays * 2 + xOffset, genes2 / 2 - arrays / 2 + yOffset}}]}],  
  Graphics[Text["Arrays",  
    {arrays * 1.5 + xOffset, genes2 * .5 + yOffset + arrays * labelMarginVertical}]],  
  Graphics[Text["Probelets",  
    {arrays * 0.55 + xOffset, (genes2 / 2) - arrays * .5 + yOffset}, {0, 0}, {0, 1}],  
  Graphics[Text[Style["vT", labelSize],  
    {arrays * .75 + xOffset, genes2 * .5 + arrays * .25 + yOffset}, {0, 0}]],  
  Graphics[Line[{{arrays * .85 + xOffset, genes2 * .5 + arrays * .15 + yOffset},  
    {arrays + xOffset, genes2 / 2 + yOffset}}]]  
};  
  
equal = Graphics[Text[StyleForm["="], FontSize -> 60], {arrays * 2.65, genes2 / 2 - arrays * .5}, {0, 0}];  
  
barsInset = Graphics[{Inset[barsFull, {6.15 * arrays, genes2 / 2 - 4 * arrays},  
  {-1.02, 113}, {4.25 * arrays, Automatic}]}];
```

```

fig1 = Show[dataTensor, arrayletTensor, coreTensor, probeletsDisplay,
equal, barsInset, ImageSize -> 750, PlotRange -> {{-70, 1320}, {-310, 620}},
BaseStyle -> {FontFamily -> "Courier", FontSize -> labelSize}]

```

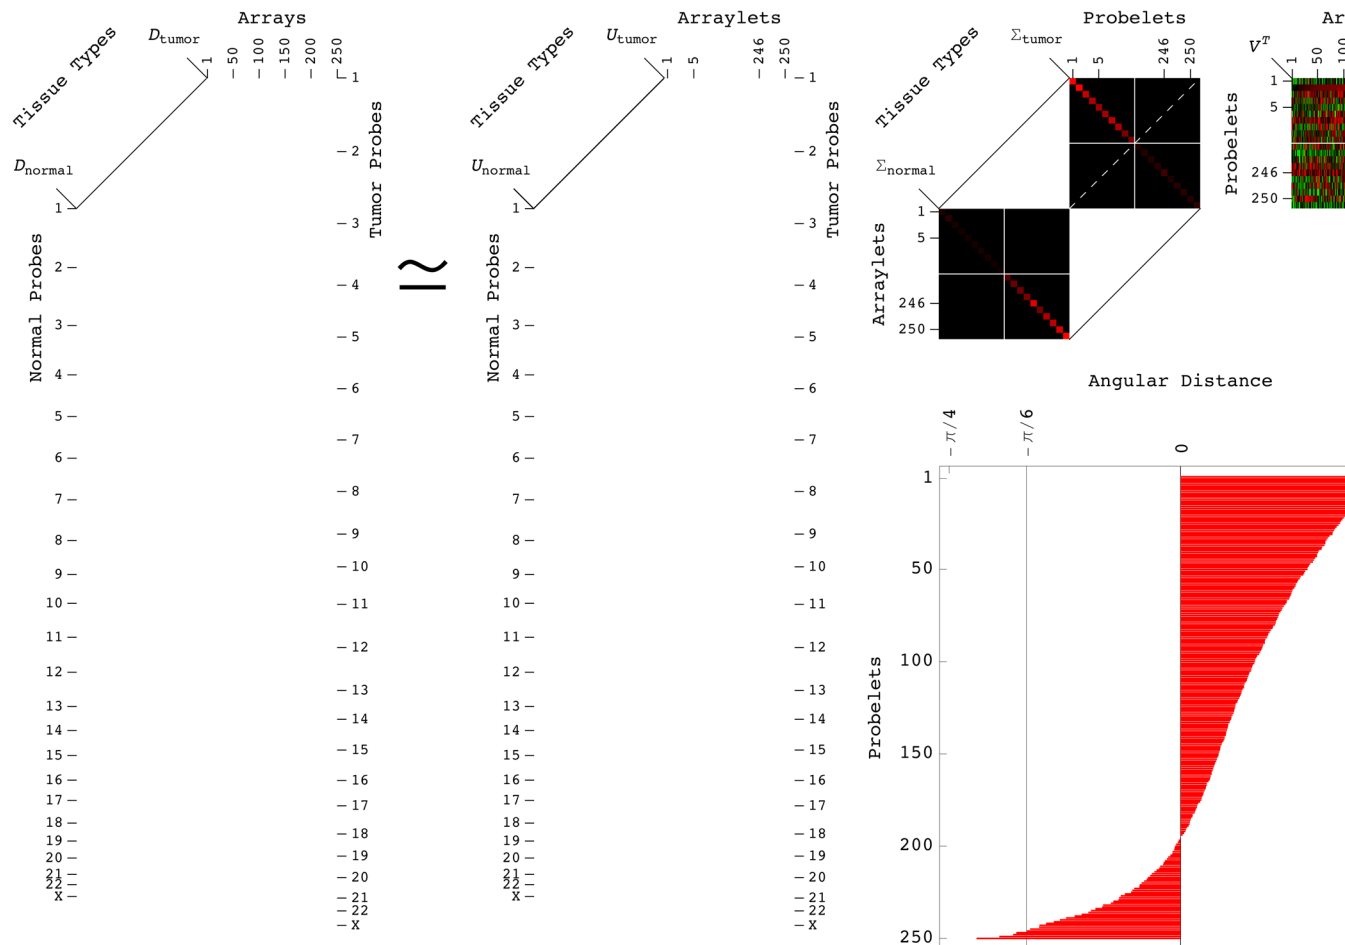

```

Export[path <> "Figure_1.pdf", fig1, "PDF", ImageSize -> 750, ImageResolution -> resolution];

```



```
(* Display Distributions of Copy Numbers Among Patient Annotations *)
```

```
(* Define Boxplot Display *)
```

```
boxPlot[data_, dataLabels_, frameLabels_, frameTicks_, plotLabel_, plotRange_] := {
  nData = Dimensions[data][[1]];
  colors = {Red, Blue, Black};
  pValue = MannWhitneyTest[{data[[1]], data[[2]]}];
  g = Table[{}, {a, 1, nData}];
  bins = Flatten[
    Table[Labeled[{}, Style[ColumnForm[{
      dataLabels[[a]], "N=" <> ToString[Length[data[[a]]]],
      Center], colors[[a]]], {a, 2, nData}]],
  Do[g[[a]] = BoxWhiskerChart[
    Flatten[
      If[a == 1, {
        Labeled[data[[a]], Style[ColumnForm[{
          dataLabels[[a]], "N=" <> ToString[Length[data[[a]]]], Center], colors[[a]]],
        If[nData == 3, {bins[[1]], bins[[2]], bins[[1]]}], {
          Table[If[b == a,
            Labeled[data[[b]], ColumnForm[{
              dataLabels[[b]], "N=" <> ToString[Length[data[[b]]]], Center]],
            {}, {b, 1, nData}]], 1],
        {"Median", {"Outliers", "●", colors[[a]]},
        {"MedianMarker", colors[[a]]}, {"Whiskers", colors[[a]]}, {"Fences", colors[[a]]}],
        PlotLabel → ColumnForm[{plotLabel[[1]],
          StringJoin["P-value = ", ToString[TraditionalForm[ScientificForm[pValue, 2,
            NumberPoint →
              If[Dimensions[Characters[ToString[NumberForm[pValue, 2, NumberFormat → (#1 &),
                ExponentFunction → (# &)]]]][[1]] < 3, "", "."]]
            ]]]], Center],
        ]]]], Center],
      If[Length[plotRange] > 0,
        PlotRange → plotRange, PlotRange → {{0.48, Automatic}, {-0.22, 0.22}}],
        FrameTicks → {{frameTicks, None}, {None, None}},
        FrameLabel → Table[frameLabels[[a]], {a, Length[frameLabels]}],
        ImageSize → 250,
        BarSpacing → Tiny,
        ChartBaseStyle → Directive[EdgeForm[{Thick, colors[[a]]}], White, Thick],
        AspectRatio → 1,
        BaseStyle → {FontFamily → "Courier", FontSize → 10}
      ], {a, 1, nData}];
  Show[Table[g[[a]], {a, 1, nData}]]
}
```

```
(* Create First Probelet Boxplot Display *)
```

```
tumorCenterColumn = Flatten[Position[headers, "tumor.center"]];
probelet1Column = Flatten[Position[headers, "probelet.1"]];

bothPos = Flatten[Position[arrayAnnotations[All, tumorCenterColumn[[1]]], "Both"]];
hmsPos = Flatten[Position[arrayAnnotations[All, tumorCenterColumn[[1]]], "HMS"]];
mskccPos = Flatten[Position[arrayAnnotations[All, tumorCenterColumn[[1]]], "MSKCC"]];
data = {Null, Null, Null};
both = arrayAnnotations[[bothPos, probelet1Column[[1]]];
hms = arrayAnnotations[[hmsPos, probelet1Column[[1]]];
mskcc = arrayAnnotations[[mskccPos, probelet1Column[[1]]];

g1 = boxPlot[
  {hms, mskcc, both},
  {"HMS", "MSKCC", "Both"},
  {"Tumor Sample Center", "Relative DNA Copy Number"},
  {{-0.2, "-0.2"}, {-0.1, "-0.1"}, 0, {0.1, "0.1"}, {0.2, "0.2"}},
  {"(a) Probelet 1"}, {}][[1]];
```

(\* Create 247th Probelet Boxplot Display \*)

```
normalDateColumn = Flatten[Position[headers, "normal.scan.date"]];
probelet247Column = Flatten[Position[headers, "probelet.247"]];

bottomPos = Flatten[Position[arrayAnnotations[[All, normalDateColumn[[1]]], "7.22.2009"]];
topPos = Flatten[Position[arrayAnnotations[[All, normalDateColumn[[1]]], "10.8.2009"]];
otherPos = Delete[Table[a, {a, rows}], Partition[Join[topPos, bottomPos], 1]];
bottom = arrayAnnotations[[bottomPos, probelet247Column[[1]]];
top = arrayAnnotations[[topPos, probelet247Column[[1]]];
other = arrayAnnotations[[otherPos, probelet247Column[[1]]];
pValue = MannWhitneyTest[{bottom, top}];

g2 = boxPlot[
  {bottom, top, other},
  {"7.22.2009", "10.8.2009", "Other"},
  {"Normal Sample Scan Date", ""}, {{-0.2, "    "}, {-0.1, "    "},
  {0, "    "}, {0.1, "    "}, {0.2, "    "}}, {"(b) Probelet 247"}, {}][[1]]];
```

(\* Create 248th Probelet Boxplot Display \*)

```
normalBatchScannerColumn = Flatten[Position[headers, "normal.batch/scanner"]];
probelet248Column = Flatten[Position[headers, "probelet.248"]];

hmsPos = Flatten[Position[arrayAnnotations[[All, normalBatchScannerColumn[[1]]], "HMS_8/2331"]];
hms = arrayAnnotations[[hmsPos, probelet248Column[[1]]];
otherPos = Complement[Table[a, {a, rows}], hmsPos];
other = arrayAnnotations[[otherPos, probelet248Column[[1]]];

g3 = boxPlot[
  {hms, other},
  {"HMS 8/2331", "Other"},
  {"Normal Sample Batch/Scanner", ""}, {{-0.2, "    "}, {-0.1, "    "},
  {0, "    "}, {0.1, "    "}, {0.2, "    "}}, {"(c) Probelet 248"}, {}][[1]]];
```

(\* Create 249th Probelet Boxplot Display \*)

```
normalBatchScannerColumn = Flatten[Position[headers, "normal.batch/scanner"]];
probelet249Column = Flatten[Position[headers, "probelet.249"]];

hmsPos = Flatten[Position[arrayAnnotations[[All, normalBatchScannerColumn[[1]]], "HMS_8/2331"]];
hms = arrayAnnotations[[hmsPos, probelet249Column[[1]]];
otherPos = Complement[Table[a, {a, rows}], hmsPos];
other = arrayAnnotations[[otherPos, probelet249Column[[1]]];

g4 = boxPlot[
  {hms, other},
  {"HMS 8/2331", "Other"},
  {"Normal Sample Batch/Scanner", "Relative DNA Copy Number"},
  {{-0.2, "-0.2"}, {-0.1, "-0.1"}, 0, {0.1, "0.1"}, {0.2, "0.2"}},
  {"(d) Probelet 249"}, {}][[1]]];
```

(\* Create 250th Probelet Boxplot Display \*)

```
normalDateColumn = Flatten[Position[headers, "normal.scan.date"]];
probelet250Column = Flatten[Position[headers, "probelet.250"]];

augPos = Flatten[Position[arrayAnnotations[[All, normalDateColumn[[1]]], "4.18.2007"]];
julyPos = Flatten[Position[arrayAnnotations[[All, normalDateColumn[[1]]], "7.22.2009"]];
otherPos = Delete[Table[a, {a, 251}], Partition[Join[augPos, julyPos], 1]];
aug = arrayAnnotations[[augPos, probelet250Column[[1]]];
july = arrayAnnotations[[julyPos, probelet250Column[[1]]];
other = arrayAnnotations[[otherPos, probelet250Column[[1]]];

g5 = boxPlot[
  {aug, july, other},
  {"4.18.2007", "7.22.2009", "Other"},
  {"Normal Sample Scan Date", ""}, {{-0.2, "    "}, {-0.1, "    "},
  {0, "    "}, {0.1, "    "}, {0.2, "    "}}, {"(e) Probelet 250"}, {}][[1]]];
```

(\* Create 251st Probelet Boxplot Display \*)

```

normalCenterColumn = Flatten[Position[headers, "normal.center"]];
probelet251Column = Flatten[Position[headers, "probelet.251"]];

hmsPos = Flatten[Position[arrayAnnotations[[All, normalCenterColumn[[1]]], "HMS"]];
mskccPos = Flatten[Position[arrayAnnotations[[All, normalCenterColumn[[1]]], "MSKCC"]];
data = {Null, Null, Null};
bothPos = Flatten[Position[arrayAnnotations[[All, normalCenterColumn[[1]]], "Both"]];
hms = arrayAnnotations[[hmsPos, probelet251Column[[1]]];
mskcc = arrayAnnotations[[mskccPos, probelet251Column[[1]]];
both = arrayAnnotations[[bothPos, probelet251Column[[1]]];

g6 = boxPlot[
  {hms, mskcc, both},
  {"HMS", "MSKCC", "Both"},
  {"Normal Sample Center", ""},
  {{-0.2, ""}, {-0.1, ""}, {0, ""}, {0.1, ""}, {0.2, ""}},
  {"(f) Probelet 251"}, {}][[1]];

```

```
sFig8 = GraphicsGrid[{{g1, g2, g3}, {g4, g5, g6}}, Spacings -> {-55, 15}, ImageSize -> 750]
```

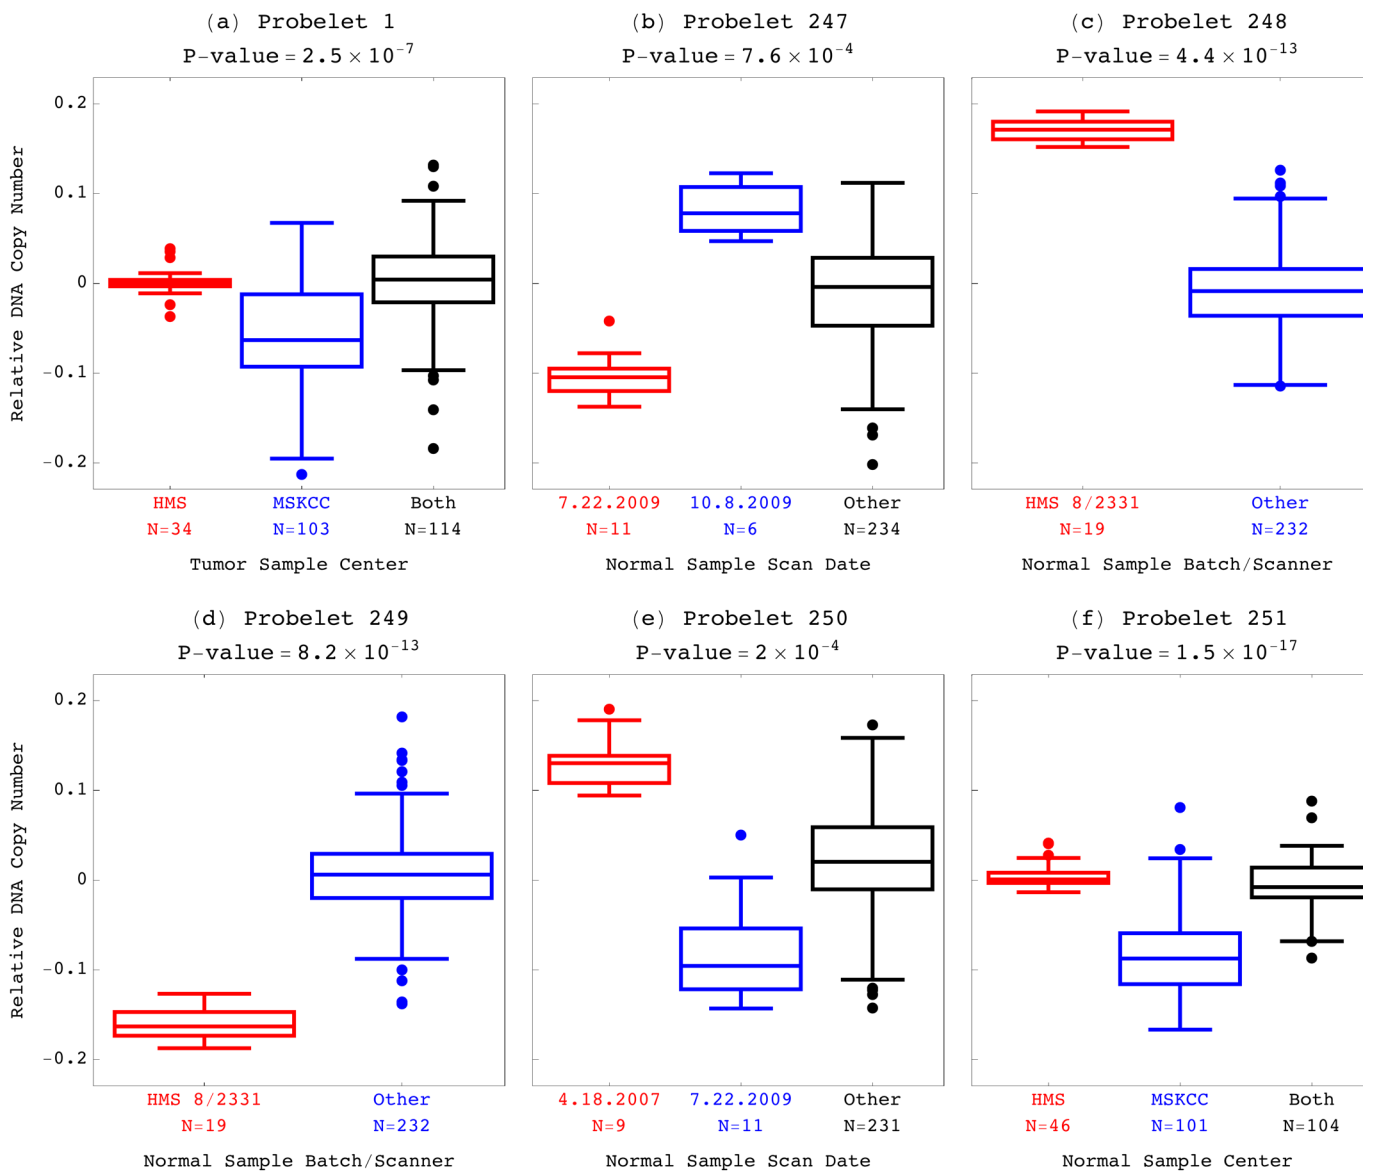

```

Export[path <> "Supplementary_Figure_8.pdf",
  sFig8, "PDF", ImageSize -> 750, ImageResolution -> resolution];

```

```
(* Redefine Boxplot Display *)
```

```
boxPlot[data_, dataLabels_, frameLabels_,
  frameTicks_, plotLabel_, plotRange_, pValueLabel_, outlierStyle_] := {
  nData = Dimensions[data][[1]];
  colors = {Red, Blue, Black};
  pValue = MannWhitneyTest[{data[[1]], data[[2]]}];
  g = Table[{}, {a, 1, nData}];
  bins = Flatten[
    Table[Labeled[{}, Style[ColumnForm[{
      dataLabels[[a]], "N=" <> ToString[NumberForm[Length[data[[a]]], DigitBlock → 3]],
      Center], colors[[a]]], {a, 2, nData}]]];
  Do[g[[a]] = BoxWhiskerChart[
    Flatten[
      If[a == 1, {
        Labeled[data[[a]], Style[ColumnForm[{
          dataLabels[[a]], "N=" <> ToString[NumberForm[Length[data[[a]]], DigitBlock → 3]],
          Center], colors[[a]]],
        If[nData == 3, {bins[[1]], bins[[2]], bins[[1]]}], {
          Table[If[b == a, Labeled[data[[b]], ColumnForm[{
            dataLabels[[b]], "N=" <> ToString[Length[data[[b]]], Center]],
              {}], {b, 1, nData}]]], 1],
        {"Median", {"Outliers", outlierStyle, colors[[a]]},
        {"MedianMarker", colors[[a]]}, {"Whiskers", colors[[a]]}, {"Fences", colors[[a]]}],
        If[Length[pValueLabel] ≠ 0,
          PlotLabel → ColumnForm[{plotLabel[[1]],
            pValueLabel[[1]], Center},
          PlotLabel → ColumnForm[{plotLabel[[1]],
            StringJoin["P-value = ", ToString[TraditionalForm[ScientificForm[pValue, 2,
              NumberPoint →
                If[Dimensions[Characters[ToString[NumberForm[pValue, 2, NumberFormat → (#1 &),
                  ExponentFunction → (# &)]]][[1]] < 3, "", "."]]
                ]]]], Center]],
        ]]]], Center]],
      If[Length[plotRange] > 0,
        PlotRange → plotRange, PlotRange → {{0.48, Automatic}, {-0.22, 0.22}}],
        FrameTicks → {{frameTicks, None}, {None, None}},
        FrameLabel → Table[frameLabels[[a]], {a, Length[frameLabels]}],
        ImageSize → 250,
        BarSpacing → Tiny,
        ChartBaseStyle → Directive[EdgeForm[{Thick, colors[[a]]}], White, Thick],
        AspectRatio → 1,
        BaseStyle → {FontFamily → "Courier", FontSize → 10}
      ], {a, 1, nData}];
  Show[Table[g[[a]], {a, 1, nData}]]
}
```

(\* Create 246th Probelet and Corresponding Tumor and Normal Arraylets Boxplot Displays \*)

```
xTumorLoc = tumorChromosomeBounds[[23, 1]];
xNormalLoc = normalChromosomeBounds[[23, 1]];
tumorArraylet246 = tumorArraylets[[All, 246]];
normalArraylet246 = normalArraylets[[All, 246]];

genderColumn = Flatten[Position[headers, "copy-number.gender"]];
probelet246Column = Flatten[Position[headers, "probelet.246"]];

male = arrayAnnotations[[
  Flatten[Position[arrayAnnotations[[All, genderColumn[[1]]], "MALE"], probelet246Column[[1]]];
female = arrayAnnotations[[Flatten[Position[arrayAnnotations[[All, genderColumn[[1]]], "FEMALE"],
  probelet246Column[[1]]];

probelet246 = boxPlot[
  {female, male},
  {"Female", "Male"},
  {"Patient Gender", "Relative DNA Copy Number"},
  {{-0.05, "-0.05"}, 0, {0.05, "0.05"}, {0.1, "0.1"}, {0.15, "0.15"}},
  {"(a) Probelet 246"}, {{0.48, Automatic}, {-0.05, 0.15}}, {}, {"●"}[[1]];

normal246 = boxPlot[{normalArraylet246[[xNormalLoc + 1 ;; Length[normalArraylet246]]],
  normalArraylet246[[1 ;; xNormalLoc]]},
  {"X Chromosome", "Autosomal"},
  {"Normal Probe Location", " "},
  {{-0.01, "-0.01"}, {-0.005, "-0.005"}, 0, {0.005, "0.005"},
  {0.01, "0.01"}, {0.015, "0.015"}}, {"(b) Normal Arraylet 246"},
  {{0.48, Automatic}, {-0.005, 0.015}},
  {"P-value << 10-38"}, {""}[[1]];

tumor246 = boxPlot[{tumorArraylet246[[xTumorLoc + 1 ;; Length[tumorArraylet246]]],
  tumorArraylet246[[1 ;; xTumorLoc]]},
  {"X Chromosome", "Autosomal"},
  {"Tumor Probe Location", " "},
  {{-0.01, "-0.01"}, {-0.005, "-0.005"}, 0, {0.005, "0.005"}, {0.01, "0.01"}},
  {"(c) Tumor Arraylet 246"},
  {{0.48, Automatic}, {-0.01, 0.01}},
  {"P-value << 10-38"}, {""}[[1]];

sFig9 = GraphicsGrid[{{probelet246, normal246, tumor246}}, Spacings -> -30, ImageSize -> 750]
```

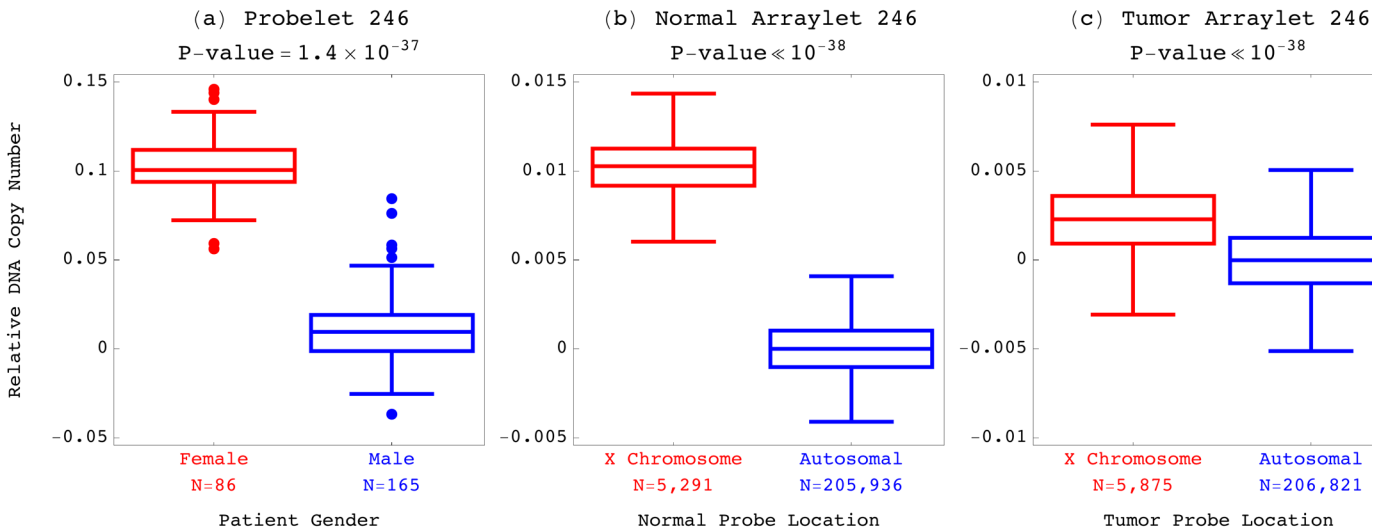

```
Export[path <> "Supplementary_Figure_9.pdf",
  sFig9, "PDF", ImageSize -> 750, ImageResolution -> resolution];
```

(\* Compute and Display Kaplan-Meier Survival Curves and Log-Rank Test \*)

```
monthConversion = (365.25 / 12);
Clear[frameX, frameY, labelX, labelY, xLabel, yLabel];

(* Read Survival and Classification Data *)

annotationColumn[annotation_] :=
  Transpose[annotations][[Position[annotationNames, annotation][[1, 1]]]];
options[annotation_] := Intersection[annotationColumn[annotation]];

optionNumbers[annotation_] := Dimensions[options[annotation]][[1]];
optionCounts[annotation_] := Table[Count[annotationColumn[annotation], options[annotation][[a]]],
  {a, 1, optionNumbers[annotation]}];

(* Identify the Two or More Largest Classification Groups *)

order[annotation_] := Sort[optionCounts[annotation], Greater];
first[annotation_] :=
  If[annotation == "Chemotherapy" ||
    annotation == "Probelet_2/Chemotherapy" ||
    annotation == "Arraylet_2/Chemotherapy",
    Position[optionCounts[annotation], order[annotation][[2]]][[1, 1]],
    Position[optionCounts[annotation], order[annotation][[1]]][[1, 1]]];
second[annotation_] :=
  If[annotation == "Chemotherapy",
    Position[optionCounts[annotation], order[annotation][[1]]][[1, 1]],
    If[displayNumber == 2,
      Position[optionCounts[annotation], order[annotation][[2]]][[1, 1]],
      Position[optionCounts[annotation], order[annotation][[3]]][[1, 1]]];
third[annotation_] :=
  If[annotation == "Probelet_2/Chemotherapy" ||
    annotation == "Arraylet_2/Chemotherapy",
    Position[optionCounts[annotation], order[annotation][[1]]][[1, 1]],
    Position[optionCounts[annotation], order[annotation][[2]]][[1, 1]]];
fourth[annotation_] := Position[optionCounts[annotation], order[annotation][[4]]][[1, 1]];
groups[annotation_] := Sort[Transpose[Join[{annotationColumn[annotation]}, {times}, {status}]]];
optionCountsPosition[annotation_] := Join[{0}, Table[Sum[optionCounts[annotation][[a]], {a, 1, b}],
  {b, 1, Dimensions[optionCounts[annotation]][[1]]}];
firstGroup[annotation_] := Take[groups[annotation],
  {optionCountsPosition[annotation][[first[annotation]]] + 1,
  optionCountsPosition[annotation][[first[annotation] + 1]}];
secondGroup[annotation_] := Take[groups[annotation],
  {optionCountsPosition[annotation][[second[annotation]]] + 1,
  optionCountsPosition[annotation][[second[annotation] + 1]}];
thirdGroup[annotation_] := If[displayNumber >= 3,
  Take[groups[annotation],
  {optionCountsPosition[annotation][[third[annotation]]] + 1,
  optionCountsPosition[annotation][[third[annotation] + 1]}];
fourthGroup[annotation_] := If[displayNumber >= 4,
  Take[groups[annotation],
  {optionCountsPosition[annotation][[fourth[annotation]]] + 1,
  optionCountsPosition[annotation][[fourth[annotation] + 1]}];
```

(\* Evaluate the Kaplan-Meier Survival Curves of the Two or More Largest Groups \*)

```

evaluateFirst[annotation_] := {
  nFirstGroup = optionCounts[annotation][[first[annotation]]];
  oFirstGroup = nFirstGroup;
  group = Transpose[firstGroup[annotation]][[2]];
  Do[If[firstGroup[annotation][[a, 3]] == 0, group = Drop[group, {a}], {a, nFirstGroup, 1, -1}];
  firstMedian = 0;
  firstLine = {{0, 1}};
  firstLines = {RGBColor[0, 0, 1], Thickness[0.0075]};
  y = 1;
  Do[
    If[firstGroup[annotation][[a, 3]] == 0,
      {oFirstGroup = oFirstGroup - 1;
        firstLines = Join[firstLines, {Line[
          {{firstGroup[annotation][[a, 2]], y + 0.02}, {firstGroup[annotation][[a, 2]], y - 0.02}}]};
        If[a == optionCounts[annotation][[first[annotation]]],
          firstLine = Join[firstLine, {{firstGroup[annotation][[a, 2]], y}}]};
        firstLine = Join[firstLine, {{firstGroup[annotation][[a, 2]], y}}];
        y = y * (nFirstGroup - a) / (nFirstGroup - a + 1);
        If[firstMedian == 0, If[y ≤ 0.5, firstMedian = Round[firstGroup[annotation][[a, 2]]]];
        firstLine = Join[firstLine, {{firstGroup[annotation][[a, 2]], y}}];
        {a, 1, optionCounts[annotation][[first[annotation]]]};
        firstLine = Graphics[{RGBColor[0, 0, 1], Thickness[0.0075], Line[firstLine]}];
        firstLines = Graphics[firstLines];
        textFirstGroup = Graphics[Text[
          Style[ColumnForm[{
            StringReplace[options[annotation][[first[annotation]]], "_" → " "],
            StringJoin["N=", ToString[nFirstGroup]],
            StringJoin["O=", ToString[oFirstGroup]]},
            Center], {RGBColor[0, 0, 1], FontFamily → "Courier"}],
          If[annotation == "Chemotherapy" ||
            annotation == "Probelet_2/Chemotherapy" ||
            annotation == "Arraylet_2/Chemotherapy",
            {-0.065 * months, 0.1},
            {0.055 * months, 0.1}]]];
    ];
};

evaluateSecond[annotation_] := {
  nSecondGroup = optionCounts[annotation][[second[annotation]]];
  oSecondGroup = nSecondGroup;
  group = Transpose[secondGroup[annotation]][[2]];
  Do[If[secondGroup[annotation][[a, 3]] == 0, group = Drop[group, {a}], {a, nSecondGroup, 1, -1}];
  secondMedian = 0;
  secondLine = {{0, 1}};
  secondLines = {RGBColor[1, 0, 0], Thickness[0.0075]};
  y = 1;
  Do[
    If[secondGroup[annotation][[a, 3]] == 0,
      {oSecondGroup = oSecondGroup - 1;
        secondLines = Join[secondLines, {Line[{{secondGroup[annotation][[a, 2]], y + 0.02},
          {secondGroup[annotation][[a, 2]], y - 0.02}}]};
        If[a == optionCounts[annotation][[second[annotation]]],
          secondLine = Join[secondLine, {{secondGroup[annotation][[a, 2]], y}}]};
        secondLine = Join[secondLine, {{secondGroup[annotation][[a, 2]], y}}];
        y = y * (nSecondGroup - a) / (nSecondGroup - a + 1);
        If[secondMedian == 0, If[y ≤ 0.5, secondMedian = Round[secondGroup[annotation][[a, 2]]]];
        secondLine = Join[secondLine, {{secondGroup[annotation][[a, 2]], y}}];
        {a, 1, optionCounts[annotation][[second[annotation]]]};
        secondLine = Graphics[{RGBColor[1, 0, 0], Thickness[0.0075], Line[secondLine]}];
        secondLines = Graphics[secondLines];
        textSecondGroup = Graphics[
          Text[Style[ColumnForm[{
            StringReplace[options[annotation][[second[annotation]]], "_" → " "],
            StringJoin["N=", ToString[nSecondGroup]],
            StringJoin["O=", ToString[oSecondGroup]]},
            Center], {RGBColor[1, 0, 0], FontFamily → "Courier"}],
          {If[annotation == "Arraylet_2/Chemotherapy" ||
            ylabel = "Patients from the Independent Set",
            0.7, If[secondMedian < 50, 0.8, 0.72]} * months, 0.9}]]];
    ];
};

```

```

evaluateThird[annotation_, displayNumber_] :=
If[displayNumber ≥ 3, {
  nThirdGroup = optionCounts[annotation][[third[annotation]]];
  oThirdGroup = nThirdGroup;
  group = Transpose[thirdGroup[annotation]][[2]];
  Do[If[thirdGroup[annotation][[a, 3]] == 0, group = Drop[group, {a}], {a, nThirdGroup, 1, -1}];
  thirdMedian = 0;
  thirdLine = {{0, 1}};
  thirdLines = {RGBColor[0, 0.5, 0], Thickness[0.0075]};
  y = 1;
  Do[
    If[thirdGroup[annotation][[a, 3]] == 0,
      {oThirdGroup = oThirdGroup - 1;
        thirdLines = Join[thirdLines, {Line[{{thirdGroup[annotation][[a, 2]], y + 0.02},
          {thirdGroup[annotation][[a, 2]], y - 0.02}}]}],
      {thirdLine = Join[thirdLine, {{thirdGroup[annotation][[a, 2]], y}}];
        y = y * (nThirdGroup - a) / (nThirdGroup - a + 1);
        If[thirdMedian == 0, If[y ≤ 0.5, thirdMedian = Round[thirdGroup[annotation][[a, 2]]]];
          thirdLine = Join[thirdLine, {{thirdGroup[annotation][[a, 2]], y}}];
        {a, 1, optionCounts[annotation][[third[annotation]]]};
        thirdLine = Graphics[{RGBColor[0, 0.5, 0], Thickness[0.0075], Line[thirdLine]};
        thirdLines = Graphics[thirdLines];
        textThirdGroup = Graphics[
          Text[Style[ColumnForm[
            StringReplace[options[annotation][[third[annotation]]], "_" → " "],
            StringJoin["N=", ToString[nThirdGroup]],
            StringJoin["O=", ToString[oThirdGroup]],
            Center], {RGBColor[0, 0.5, 0], FontFamily → "Courier"}],
            {If[annotation == "Arraylet_2/Chemotherapy", 0.7, If[secondMedian < 50, 0.8, 0.72]] * months,
              If[secondMedian < 50, 0.65, 0.35]}]]],
        {thirdLine = Graphics[];
          thirdLines = Graphics[];
          textThirdGroup = Graphics[]}]

evaluateFourth[annotation_, displayNumber_] :=
If[displayNumber ≥ 4, {
  nFourthGroup = optionCounts[annotation][[fourth[annotation]]];
  oFourthGroup = nFourthGroup;
  group = Transpose[fourthGroup[annotation]][[2]];
  Do[If[fourthGroup[annotation][[a, 3]] == 0, group = Drop[group, {a}], {a, nFourthGroup, 1, -1}];
  fourthMedian = 0;
  fourthLine = {{0, 1}};
  fourthLines = {RGBColor[0.75, 0, 1], Thickness[0.0075]};
  y = 1;
  Do[
    If[fourthGroup[annotation][[a, 3]] == 0,
      {oFourthGroup = oFourthGroup - 1;
        fourthLines = Join[fourthLines, {Line[{{fourthGroup[annotation][[a, 2]], y + 0.02},
          {fourthGroup[annotation][[a, 2]], y - 0.02}}]}],
      {fourthLine = Join[fourthLine, {{fourthGroup[annotation][[a, 2]], y}}];
        y = y * (nFourthGroup - a) / (nFourthGroup - a + 1);
        If[fourthMedian == 0, If[y ≤ 0.5, fourthMedian = Round[fourthGroup[annotation][[a, 2]]]];
          fourthLine = Join[fourthLine, {{fourthGroup[annotation][[a, 2]], y}}];
        {a, 1, optionCounts[annotation][[fourth[annotation]]]};
        fourthLine = Graphics[{RGBColor[0.75, 0, 1], Thickness[0.0075], Line[fourthLine]};
        fourthLines = Graphics[fourthLines];
        textFourthGroup = Graphics[Text[
          Style[ColumnForm[
            StringReplace[options[annotation][[fourth[annotation]]], "_" → " "],
            StringJoin["N=", ToString[nFourthGroup]],
            StringJoin["O=", ToString[oFourthGroup]],
            Center], {RGBColor[0.75, 0, 1], FontFamily → "Courier"}],
            If[annotation == "Probelet_2/Chemotherapy" ||
              annotation == "Arraylet_2/Chemotherapy",
              {-0.065 * months, 0.35},
              {0.055 * months, 0.35}]]],
        {fourthLine = Graphics[];
          fourthLines = Graphics[];
          textFourthGroup = Graphics[]}]

```



```
(* Evaluate the Log-Rank Test P-value *)
```

```
evaluatePValue[annotation_] := {  
  statistics = Sort[Transpose[Join[{times}, {annotationColumn[annotation]}, {status}]]];  
  firstObservations =  
    Table[If[statistics[[a, 2]] == options[annotation][[first[annotation]]], statistics[[a, 3]], 0],  
    {a, 1, patients}];  
  firstEvents = Table[If[statistics[[a, 2]] == options[annotation][[first[annotation]]],  
    ReplaceAll[statistics[[a, 3]], 0 → 1], 0],  
    {a, 1, patients}];  
  secondObservations = Table[  
    If[statistics[[a, 2]] == options[annotation][[second[annotation]]], statistics[[a, 3]], 0],  
    {a, 1, patients}];  
  secondEvents = Table[If[statistics[[a, 2]] == options[annotation][[second[annotation]]],  
    ReplaceAll[statistics[[a, 3]], 0 → 1], 0],  
    {a, 1, patients}];  
  Do[If[statistics[[a, 1]] == statistics[[a - 1, 1]], {  
    firstObservations[[a - 1]] = firstObservations[[a - 1]] + firstObservations[[a]];  
    firstObservations = Drop[firstObservations, {a}];  
    firstEvents[[a - 1]] = firstEvents[[a - 1]] + firstEvents[[a]];  
    firstEvents = Drop[firstEvents, {a}];  
    secondObservations[[a - 1]] = secondObservations[[a - 1]] + secondObservations[[a]];  
    secondObservations = Drop[secondObservations, {a}];  
    secondEvents[[a - 1]] = secondEvents[[a - 1]] + secondEvents[[a]];  
    secondEvents = Drop[secondEvents, {a}];  
  }], {a, patients, 2, -1}];  
  timesNumbers = Dimensions[firstObservations][[1]];  
  firstNumbers =  
    Table[Total[firstEvents] - Total[Take[firstEvents, 1 ;; a - 1]], {a, 1, timesNumbers}];  
  secondNumbers = Table[Total[secondEvents] - Total[Take[secondEvents, 1 ;; a - 1]],  
    {a, 1, timesNumbers}];  
  observations = firstObservations + secondObservations;  
  numbers = firstNumbers + secondNumbers;  
  firstExpectations = Table[If[numbers[[a]] == 0, 0,  
    N[observations[[a]] * firstNumbers[[a]] / numbers[[a]]],  
    {a, 1, timesNumbers}];  
  secondExpectations = Table[If[numbers[[a]] == 0, 0,  
    N[observations[[a]] * secondNumbers[[a]] / numbers[[a]]],  
    {a, 1, timesNumbers}];  
  variances = Table[If[numbers[[a]] ≤ 1, 0,  
    N[firstNumbers[[a]] * secondNumbers[[a]] * observations[[a]] *  
    (numbers[[a]] - observations[[a]]) / numbers[[a]]^2 / (numbers[[a]] - 1)],  
    {a, 1, timesNumbers}];  
  z = (N[Total[firstObservations] - firstExpectations])^2 / N[Total[variances]];  
  pValue = 1 - CDF[ChiSquareDistribution[1], {z}][[1]]];
```

```
(* Create the Kaplan-Meier Survival Curves of the Two or More Largest Groups *)
```

```
w = 0.0075;  
months = If[annotation == "Chemotherapy" ||  
  annotation == "Probelet_2/Chemotherapy" ||  
  annotation == "Arraylet_2/Chemotherapy", 54, 60];  
framey[ylabel_] := ReplaceAll[ReplaceAll[  
  Table[{a, Style[If[ylabel == "False", " ", ToString[a]], FontFamily → "Courier"]},  
    {a, 0, 1, 0.25}], "1." → "1", "0." → "0"];  
labelx[xlabel_] := If[xlabel == True, Style["Survival Time (Months)", FontFamily → "Courier"], ""];  
plotlabelx[annotation_, xlabel_] :=  
  Style[ColumnForm[  
    If[hazardRatio == "", {StringJoin[xlabel, " ", StringReplace[annotation, "_" → " " ]],  
      StringJoin[" P-value = ", ToString[TraditionalForm[  
        ScientificForm[pValue, 2, NumberPoint →  
          If[Dimensions[Characters[ToString[NumberForm[pValue, 2, NumberFormat → (#1 &),  
            ExponentFunction → (# &)]]][[1]] < 3, "", "."]]]]], {  
        StringJoin[xlabel, " ", StringReplace[annotation, "_" → " " ]],  
        StringJoin[" P-value = ", ToString[TraditionalForm[  
          ScientificForm[pValue, 2, NumberPoint →  
            If[Dimensions[Characters[ToString[NumberForm[pValue, 2, NumberFormat → (#1 &),  
              ExponentFunction → (# &)]]][[1]] < 3, "", "."]]  
        ]]], StringJoin[" Hazard Ratio", hazardRatio]], Left], FontFamily → "Courier"];
```

```

labely[ylabel_] :=
  If[ylabel == "False", Style[ColumnForm[{" ", " "}, Center], FontFamily → "Courier"],
    Style[ColumnForm[{title, ylabel}, Center], FontFamily → "Courier"]];
display[annotation_, displayNumber_, xplotlabel_, xlabel_, ylabel_, medianTicks_, highlight_] := {
  evaluateFirst[annotation];
  evaluateSecond[annotation];
  evaluateThird[annotation, displayNumber];
  evaluateFourth[annotation, displayNumber];
  framex = If[displayNumber == 2,
    {{0, Style["0", FontFamily → "Courier"]},
     {firstMedian, If[firstMedian == secondMedian, "", Style[StringJoin[medianTicks[[1]],
       ToString[firstMedian], medianTicks[[2]]], {RGBColor[0, 0, 1], FontFamily → "Courier"}]}},
     {secondMedian, Style[StringJoin[medianTicks[[3]], ToString[secondMedian], medianTicks[[4]]],
       {RGBColor[1, 0, 0], FontFamily → "Courier"}]}},
     {40, Style["40", FontFamily → "Courier"]},
     If[annotation == "Chemotherapy",
       {50, Style["50", FontFamily → "Courier"]},
       {60, Style["60", FontFamily → "Courier"]}]}},
    {{0, Style["0", FontFamily → "Courier"]},
     {fourthMedian, Style[StringJoin[medianTicks[[7]], If[fourthMedian == firstMedian,
       "", If[fourthMedian == thirdMedian, "", ToString[fourthMedian]]],
       medianTicks[[8]]], {RGBColor[0.75, 0, 1], FontFamily → "Courier"}]}},
     {thirdMedian, Style[StringJoin[medianTicks[[5]], ToString[thirdMedian], medianTicks[[6]]],
       {RGBColor[0, 0.5, 0], FontFamily → "Courier"}]}},
     {firstMedian, Style[StringJoin[medianTicks[[1]], ToString[firstMedian], medianTicks[[2]]],
       {RGBColor[0, 0, 1], FontFamily → "Courier"}]}},
     {secondMedian, Style[StringJoin[medianTicks[[3]], ToString[secondMedian], medianTicks[[4]]],
       {RGBColor[1, 0, 0], FontFamily → "Courier"}]}},
     {40, Style["40", FontFamily → "Courier"]},
     If[annotation == "Arraylet_2/Chemotherapy",
       {40, Style["40", FontFamily → "Courier"]},
       If[annotation == "Probelet_2/Chemotherapy",
         {50, Style["50", FontFamily → "Courier"]},
         {60, Style["60", FontFamily → "Courier"]}]}]}];
If[displayNumber == 2, evaluatePValue[annotation]];
Show[Graphics[If[highlight == True, {RGBColor[1, 1, 0.8], Rectangle[{
  firstMedian, -0.025}, {secondMedian, 1.025}]}, {}]],
  fourthLine, fourthLines, textFourthGroup,
  thirdLine, thirdLines, textThirdGroup,
  firstLine, firstLines, textFirstGroup,
  secondLine, secondLines, textSecondGroup},
  GridLines → {None, {{0.5, Thickness[0.0025]}},
  Frame → True,
  FrameTicks → {framex, framey[ylabel], None, None},
  FrameLabel → {labelx[xlabel], labely[ylabel], None, None},
  PlotLabel → plotlabelx[annotation, xplotlabel],
  AspectRatio → If[displayNumber == 2, 1, 1],
  PlotRange → If[annotation == "Chemotherapy" ||
    annotation == "Probelet_2/Chemotherapy" ||
    annotation == "Arraylet_2/Chemotherapy",
    {{-0.225 * months, 1.025 * months}, {-0.025, 1.025}},
    {{-0.1 * months, 1.025 * months}, {-0.025, 1.025}}],
  ImageSize → 250]

```

```
(* Read TCGA Annotations of the Initial Set of 251 Patients *)
```

```
title = "Fraction of Surviving Patients";

stream = path <> "251_Patients.txt";
annotations = Import[stream, "Table"];
{patients, annotationsNumber} = Dimensions[annotations] - {1, 1};
annotationnames = Take[annotations, 1, {2, annotationsNumber + 1}][[1]];
annotations = Drop[Import[stream, "Table"], 1, 1];
Clear[stream];

times = Table[
  If[annotationColumn["Days_Death"][[a]] == "Null",
    If[annotationColumn["Days_Followup"][[a]] == "Null",
      "Null",
      annotationColumn["Days_Followup"][[a]] / monthConversion],
    annotationColumn["Days_Death"][[a]] / monthConversion],
  {a, 1, patients}];
status = Table[If[annotationColumn["Days_Death"][[a]] == "Null",
  If[annotationColumn["Days_Followup"][[a]] == "Null", 2, 0], 1],
  {a, 1, patients}];
positionNull = Position[status, 2];
Do[{
  annotations = Drop[annotations, positionNull[[a]]],
  times = Drop[times, positionNull[[a]]],
  status = Drop[status, positionNull[[a]]],
  {a, Dimensions[positionNull][[1]], 1, -1}}
patients = patients - Dimensions[positionNull][[1]];
```

```
(* Create Survival Analyses of Classification by Chromosome Number Changes *)
```

```
displayNumber = 2;

annotation = "Chromosome_10";
highlight = True;
xplotlabel = "(a)";
xlabel = True;
ylabel = "from the Initial Set";
medianTicks = Table["", {a, 1, 8}];
medianTicks[[1]] = " ";
medianTicks[[4]] = " ";
hazardRatio = "";
g1 = Show[display[annotation, displayNumber,
  xplotlabel, xlabel, ylabel, medianTicks, highlight], ImageSize -> 250];

annotation = "Chromosome_7";
highlight = True;
xplotlabel = "(b)";
xlabel = True;
ylabel = "False";
medianTicks = Table["", {a, 1, 8}];
hazardRatio = "";
g2 = Show[display[annotation, displayNumber,
  xplotlabel, xlabel, ylabel, medianTicks, highlight], ImageSize -> 250];

annotation = "Chromosome_9p";
highlight = True;
xplotlabel = "(c)";
xlabel = True;
ylabel = "False";
medianTicks = Table["", {a, 1, 8}];
medianTicks[[1]] = " ";
medianTicks[[4]] = " ";
hazardRatio = "";
g3 = Show[display[annotation, displayNumber,
  xplotlabel, xlabel, ylabel, medianTicks, highlight], ImageSize -> 250];
```

```
sFig13 = GraphicsGrid[{{g1, g2, g3}}, ImageSize -> 750, Spacings -> {-42, 2}]
```

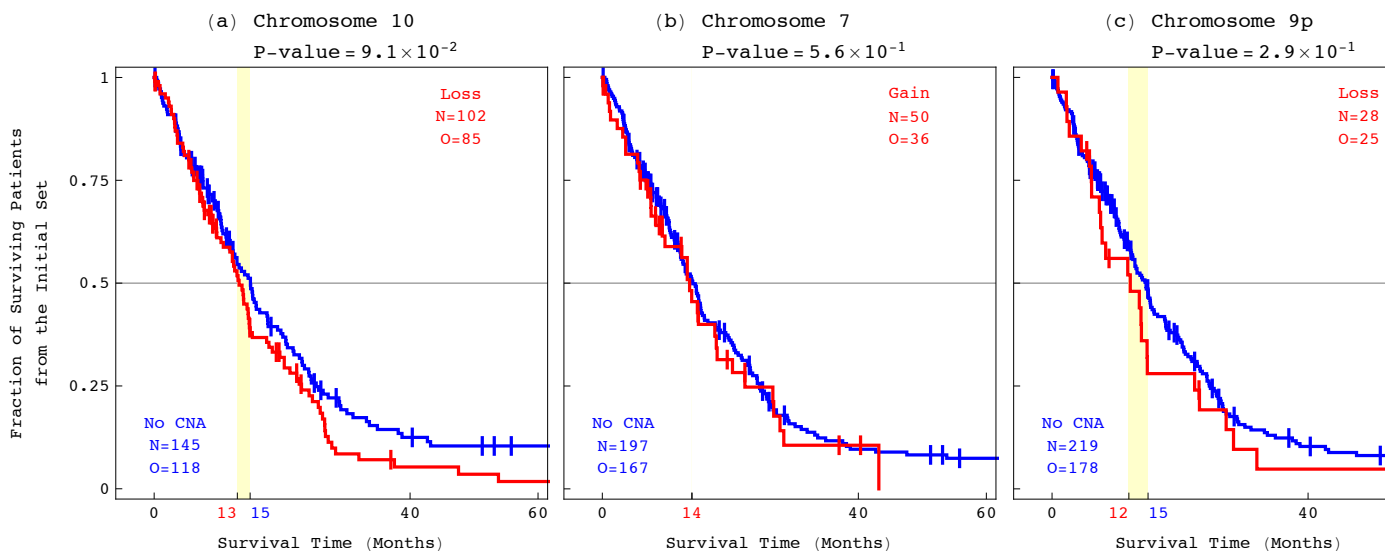

```
Export[path <> "Supplementary_Figure_13.pdf",  
sFig13, "PDF", ImageSize -> 750, ImageResolution -> resolution];
```

(\* Create Survival Analyses of Classification by Focal CNAs \*)

```
annotation = "MDM4_(Segment_14)";  
highlight = True;  
xplotlabel = "(a)";  
xlabel = False;  
ylabel = "from the Initial Set";  
medianTicks = Table["", {a, 1, 8}];  
hazardRatio = "";  
g1 = Show[display[annotation, displayNumber,  
xplotlabel, xlabel, ylabel, medianTicks, highlight], ImageSize -> 250];
```

```
annotation = "AKT3_(Segment_17)";  
highlight = True;  
xplotlabel = "(b)";  
xlabel = False;  
ylabel = "False";  
medianTicks = Table["", {a, 1, 8}];  
medianTicks[[2]] = " ";  
medianTicks[[3]] = " ";  
hazardRatio = "";  
g2 = Show[display[annotation, displayNumber,  
xplotlabel, xlabel, ylabel, medianTicks, highlight], ImageSize -> 250];
```

```

annotation = "EGFR_(Segment_44)";
highlight = True;
xplotlabel = "(c)";
xlabel = False;
ylabel = "False";
medianTicks = Table["", {a, 1, 8}];
medianTicks[[2]] = " ";
medianTicks[[3]] = " ";
hazardRatio = "";
g3 = Show[display[annotation, displayNumber,
  xplotlabel, xlabel, ylabel, medianTicks, highlight], ImageSize -> 250];

annotation = "MET_(Segment_53)";
highlight = True;
xplotlabel = "(d)";
xlabel = False;
ylabel = "from the Initial Set";
medianTicks = Table["", {a, 1, 8}];
hazardRatio = "";
g4 = Show[display[annotation, displayNumber,
  xplotlabel, xlabel, ylabel, medianTicks, highlight], ImageSize -> 250];

annotation = "METTL2B_(Segment_54)";
highlight = True;
xplotlabel = "(e)";
xlabel = False;
ylabel = "False";
medianTicks = Table["", {a, 1, 8}];
hazardRatio = "";
g5 = Show[display[annotation, displayNumber,
  xplotlabel, xlabel, ylabel, medianTicks, highlight], ImageSize -> 250];

annotation = "CDKN2A/B_(Segment_62)";
highlight = True;
xplotlabel = "(f)";
xlabel = False;
ylabel = "False";
medianTicks = Table["", {a, 1, 8}];
medianTicks[[2]] = " ";
medianTicks[[3]] = " ";
hazardRatio = "";
g6 = Show[display[annotation, displayNumber,
  xplotlabel, xlabel, ylabel, medianTicks, highlight], ImageSize -> 250];

annotation = "PTEN_(Segment_80)";
highlight = True;
xplotlabel = "(g)";
xlabel = False;
ylabel = "from the Initial Set";
medianTicks = Table["", {a, 1, 8}];
medianTicks[[1]] = " ";
medianTicks[[4]] = " ";
hazardRatio = "";
g7 = Show[display[annotation, displayNumber,
  xplotlabel, xlabel, ylabel, medianTicks, highlight], ImageSize -> 250];

annotation = "KDM5A_(Segment_90)";
highlight = True;
xplotlabel = "(h)";
xlabel = False;
ylabel = "False";
medianTicks = Table["", {a, 1, 8}];
medianTicks[[1]] = " ";
medianTicks[[4]] = " ";
hazardRatio = "";
g8 = Show[display[annotation, displayNumber,
  xplotlabel, xlabel, ylabel, medianTicks, highlight], ImageSize -> 250];

```

```

annotation = "CDK4_(Segment_94)";
highlight = True;
xplotlabel = "(i)";
xlabel = False;
ylabel = "False";
medianTicks = Table["", {a, 1, 8}];
hazardRatio = "";
g9 = Show[display[annotation, displayNumber,
  xplotlabel, xlabel, ylabel, medianTicks, highlight], ImageSize -> 250];

annotation = "MDM2_(Segment_102)";
highlight = True;
xplotlabel = "(j)";
xlabel = True;
ylabel = "from the Initial Set";
medianTicks = Table["", {a, 1, 8}];
medianTicks[[2]] = " ";
medianTicks[[3]] = " ";
hazardRatio = "";
g10 = Show[display[annotation, displayNumber,
  xplotlabel, xlabel, ylabel, medianTicks, highlight], ImageSize -> 250];

annotation = "TLK2/METTLL2A_(Segment_112)";
highlight = True;
xplotlabel = "(k)";
xlabel = True;
ylabel = "False";
medianTicks = Table["", {a, 1, 8}];
hazardRatio = "";
g11 = Show[display[annotation, displayNumber,
  xplotlabel, xlabel, ylabel, medianTicks, highlight], ImageSize -> 250];

annotation = "CCNE1_(Segment_118)";
highlight = True;
xplotlabel = "(l)";
xlabel = True;
ylabel = "False";
medianTicks = Table["", {a, 1, 8}];
medianTicks[[2]] = " ";
medianTicks[[3]] = " ";
hazardRatio = "";
g12 = Show[display[annotation, displayNumber,
  xplotlabel, xlabel, ylabel, medianTicks, highlight], ImageSize -> 250];

```

sFig14 = GraphicsGrid[

{{g1, g2, g3}}, {{g4, g5, g6}}, {{g7, g8, g9}}, {{g10, g11, g12}}, ImageSize -> 750, Spacings -> {-42, 2}]

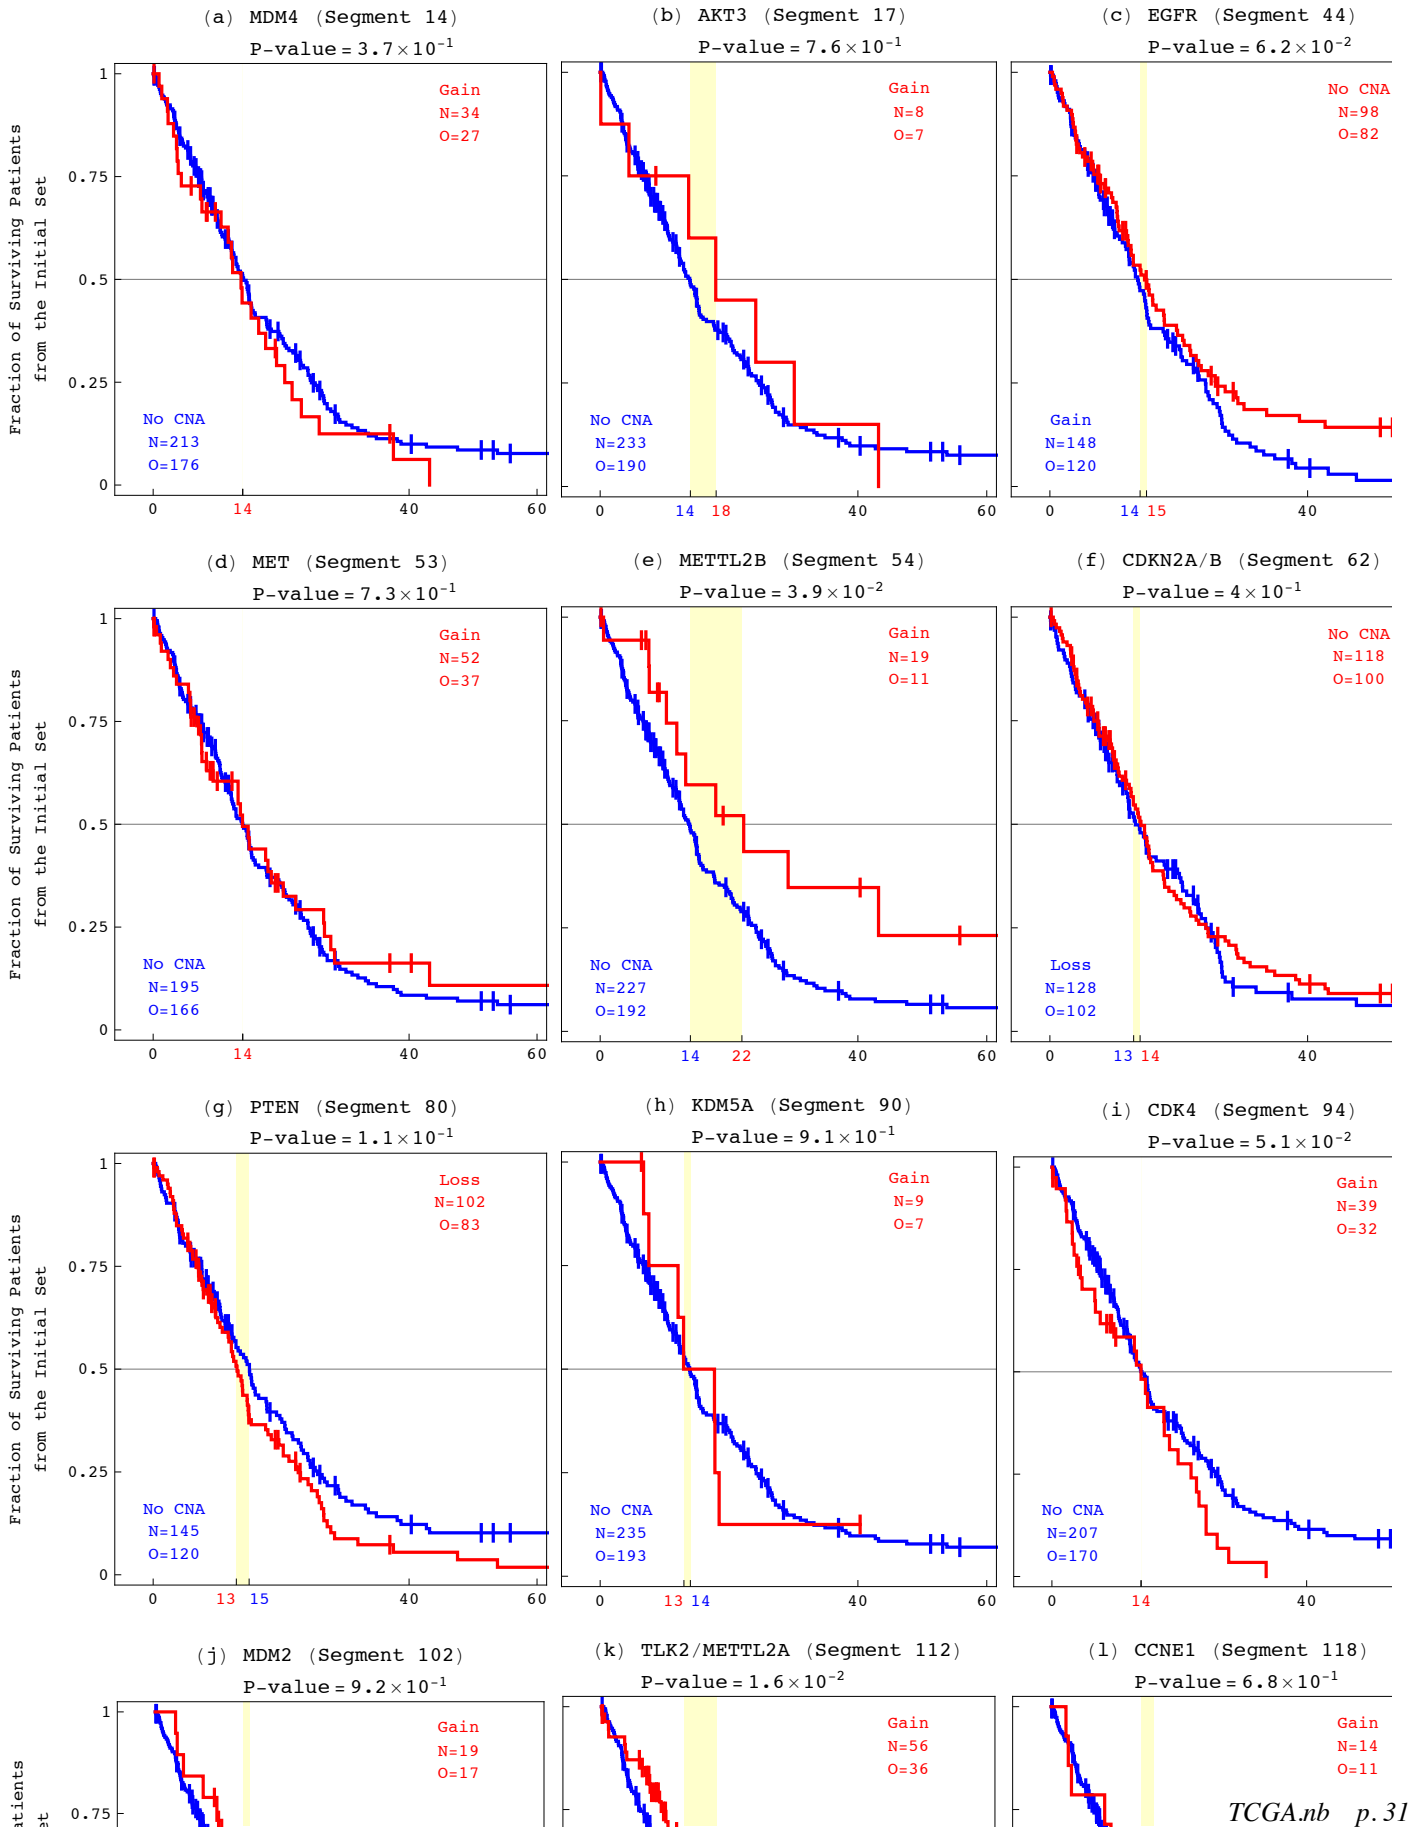

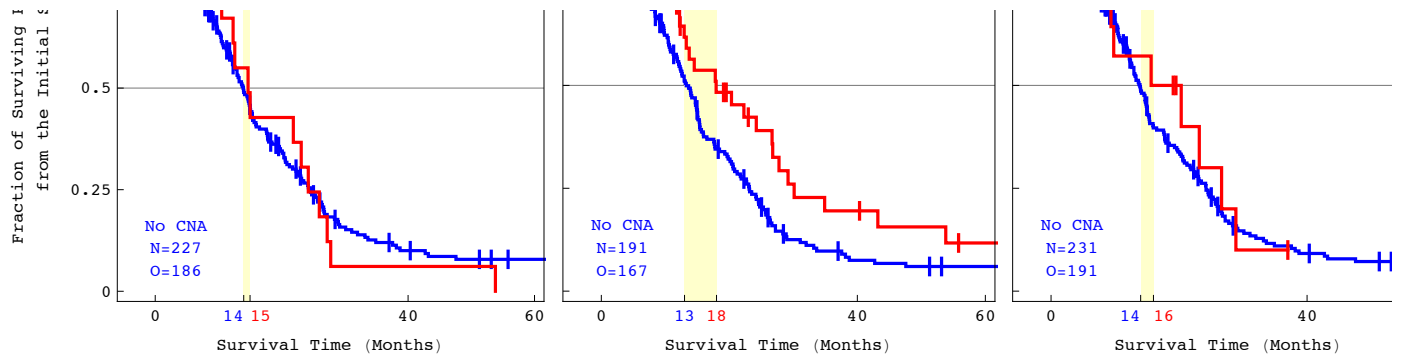

```
Export[path <> "Supplementary_Figure_14.pdf",
  sfig14, "PDF", ImageSize -> 750, ImageResolution -> resolution];
```

(\* Create Survival Analysis of Classification by IDH1 Mutation \*)

```
annotation = "IDH1_Mutation";
highlight = True;
xplotlabel = " ";
xlabel = True;
ylabel = "from the Initial Set";
medianTicks = Table["", {a, 1, 8}];
hazardRatio = "";
sfig11 = Show[display[annotation, displayNumber,
  xplotlabel, xlabel, ylabel, medianTicks, highlight], ImageSize -> 250]
```

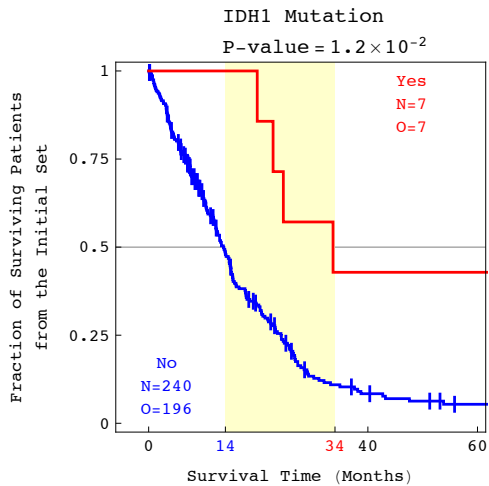

```
Export[path <> "Supplementary_Figure_11.pdf",
  sfig11, "PDF", ImageSize -> 250, ImageResolution -> resolution];
```



(\* Create Survival Analyses of Classification by GSVD, Age or Both \*)

```
annotation = "Probelet_2_(Coeff.)";
highlight = True;
xplotlabel = "(a)";
xlabel = False;
ylabel = "from the Initial Set";
medianTicks = Table["", {a, 1, 8}];
hazardRatio = "= 2.3";
g1 = Show[display[annotation, displayNumber,
  xplotlabel, xlabel, ylabel, medianTicks, highlight], ImageSize -> 250];
```

```
annotation = "Age_(Years)";
highlight = True;
xplotlabel = "(b)";
xlabel = False;
ylabel = "False";
medianTicks = Table["", {a, 1, 8}];
hazardRatio = "= 2";
g2 = Show[display[annotation, displayNumber,
  xplotlabel, xlabel, ylabel, medianTicks, highlight], ImageSize -> 250];
```

```
displayNumber = 4;
```

```
annotation = "Probelet_2/Age";
highlight = True;
xplotlabel = "(c)";
xlabel = False;
ylabel = "False";
medianTicks = Table["", {a, 1, 8}];
medianTicks[[5]] = " ";
pValue =  $4.6 * 10^{-5}$ ;
hazardRatio = "s = 1.8/1.7";
g3 = Show[display[annotation, displayNumber,
  xplotlabel, xlabel, ylabel, medianTicks, highlight], ImageSize -> 250];
```

```
(* Read TCGA Annotations of the Inclusive Set of 344 Patients *)
```

```
stream = path <> "344_Patients.txt";
annotations = Import[stream, "Table"];
{patients, annotationsNumber} = Dimensions[annotations] - {1, 1};
annotationnames = Take[annotations, 1, {2, annotationsNumber + 1}][[1]];
annotations = Drop[Import[stream, "Table"], 1, 1];
Clear[stream];

times = Table[
  If[annotationColumn["Days_Death"][[a]] == "Null",
    If[annotationColumn["Days_Followup"][[a]] == "Null",
      "Null",
      annotationColumn["Days_Followup"][[a]] / monthConversion,
      annotationColumn["Days_Death"][[a]] / monthConversion],
    {a, 1, patients}];
status = Table[If[annotationColumn["Days_Death"][[a]] == "Null",
  If[annotationColumn["Days_Followup"][[a]] == "Null", 2, 0], 1],
  {a, 1, patients}];
positionNull = Position[status, 2];
Do[{
  annotations = Drop[annotations, positionNull[[a]]],
  times = Drop[times, positionNull[[a]]],
  status = Drop[status, positionNull[[a]]],
  {a, Dimensions[positionNull][[1]], 1, -1}}
patients = patients - Dimensions[positionNull][[1]];

displayNumber = 2;

annotation = "Probelet_2_(Coeff.)";
highlight = True;
xplotlabel = "(d)";
xlabel = False;
ylabel = "from the Inclusive Confirmation Set";
medianTicks = Table["", {a, 1, 8}];
hazardRatio = "= 2.4";
g4 = Show[display[annotation, displayNumber,
  xplotlabel, xlabel, ylabel, medianTicks, highlight], ImageSize -> 250];

annotation = "Age_(Years)";
highlight = True;
xplotlabel = "(e)";
xlabel = False;
ylabel = "False";
medianTicks = Table["", {a, 1, 8}];
hazardRatio = "= 2";
g5 = Show[display[annotation, displayNumber,
  xplotlabel, xlabel, ylabel, medianTicks, highlight], ImageSize -> 250];

displayNumber = 4;

annotation = "Probelet_2/Age";
highlight = True;
xplotlabel = "(f)";
xlabel = False;
ylabel = "False";
medianTicks = Table["", {a, 1, 8}];
medianTicks[[2]] = " ";
medianTicks[[5]] = " ";
medianTicks[[7]] = " ";
pValue = 2. * 10^-6;
hazardRatio = "s = 1.9/1.8";
g6 = Show[display[annotation, displayNumber,
  xplotlabel, xlabel, ylabel, medianTicks, highlight], ImageSize -> 250];
```

```
(* Read TCGA Annotations of the Independent Set of 184 Patients *)
```

```
stream = path <> "184_Patients.txt";
annotations = Import[stream, "Table"];
{patients, annotationsNumber} = Dimensions[annotations] - {1, 1};
annotationnames = Take[annotations, 1, {2, annotationsNumber + 1}][[1]];
annotations = Drop[Import[stream, "Table"], 1, 1];
Clear[stream];

times = Table[
  If[annotationColumn["Days_Death"][[a]] == "Null",
    If[annotationColumn["Days_Followup"][[a]] == "Null",
      "Null",
      annotationColumn["Days_Followup"][[a]] / monthConversion,
      annotationColumn["Days_Death"][[a]] / monthConversion],
  {a, 1, patients}];
status = Table[If[annotationColumn["Days_Death"][[a]] == "Null",
  If[annotationColumn["Days_Followup"][[a]] == "Null", 2, 0], 1],
  {a, 1, patients}];
positionNull = Position[status, 2];
Do[{
  annotations = Drop[annotations, positionNull[[a]]],
  times = Drop[times, positionNull[[a]]],
  status = Drop[status, positionNull[[a]]],
  {a, Dimensions[positionNull][[1]], 1, -1}}
patients = patients - Dimensions[positionNull][[1]];

displayNumber = 2;

annotation = "Arraylet_2_(Corr.)";
highlight = True;
xplotlabel = "(g)";
xlabel = True;
ylabel = "from the Independent Validation Set";
medianTicks = Table["", {a, 1, 8}];
hazardRatio = "= 2.9";
g7 = Show[display[annotation, displayNumber,
  xplotlabel, xlabel, ylabel, medianTicks, highlight], ImageSize -> 250];

annotation = "Age_(Years)";
highlight = True;
xplotlabel = "(h)";
xlabel = True;
ylabel = "False";
medianTicks = Table["", {a, 1, 8}];
hazardRatio = "= 2.7";
g8 = Show[display[annotation, displayNumber,
  xplotlabel, xlabel, ylabel, medianTicks, highlight], ImageSize -> 250];

displayNumber = 4;

annotation = "Arraylet_2/Age";
highlight = True;
xplotlabel = "(i)";
xlabel = True;
ylabel = "False";
medianTicks = Table["", {a, 1, 8}];
medianTicks[[5]] = " ";
pValue = 2.6 * 10^-6;
hazardRatio = "s = 2/2.2";
g9 = Show[display[annotation, displayNumber,
  xplotlabel, xlabel, ylabel, medianTicks, highlight], ImageSize -> 250];
```

fig3 = GraphicsGrid[{{g1, g2, g3}, {g4, g5, g6}, {g7, g8, g9}}, ImageSize -> 750, Spacings -> {-56, 0}]

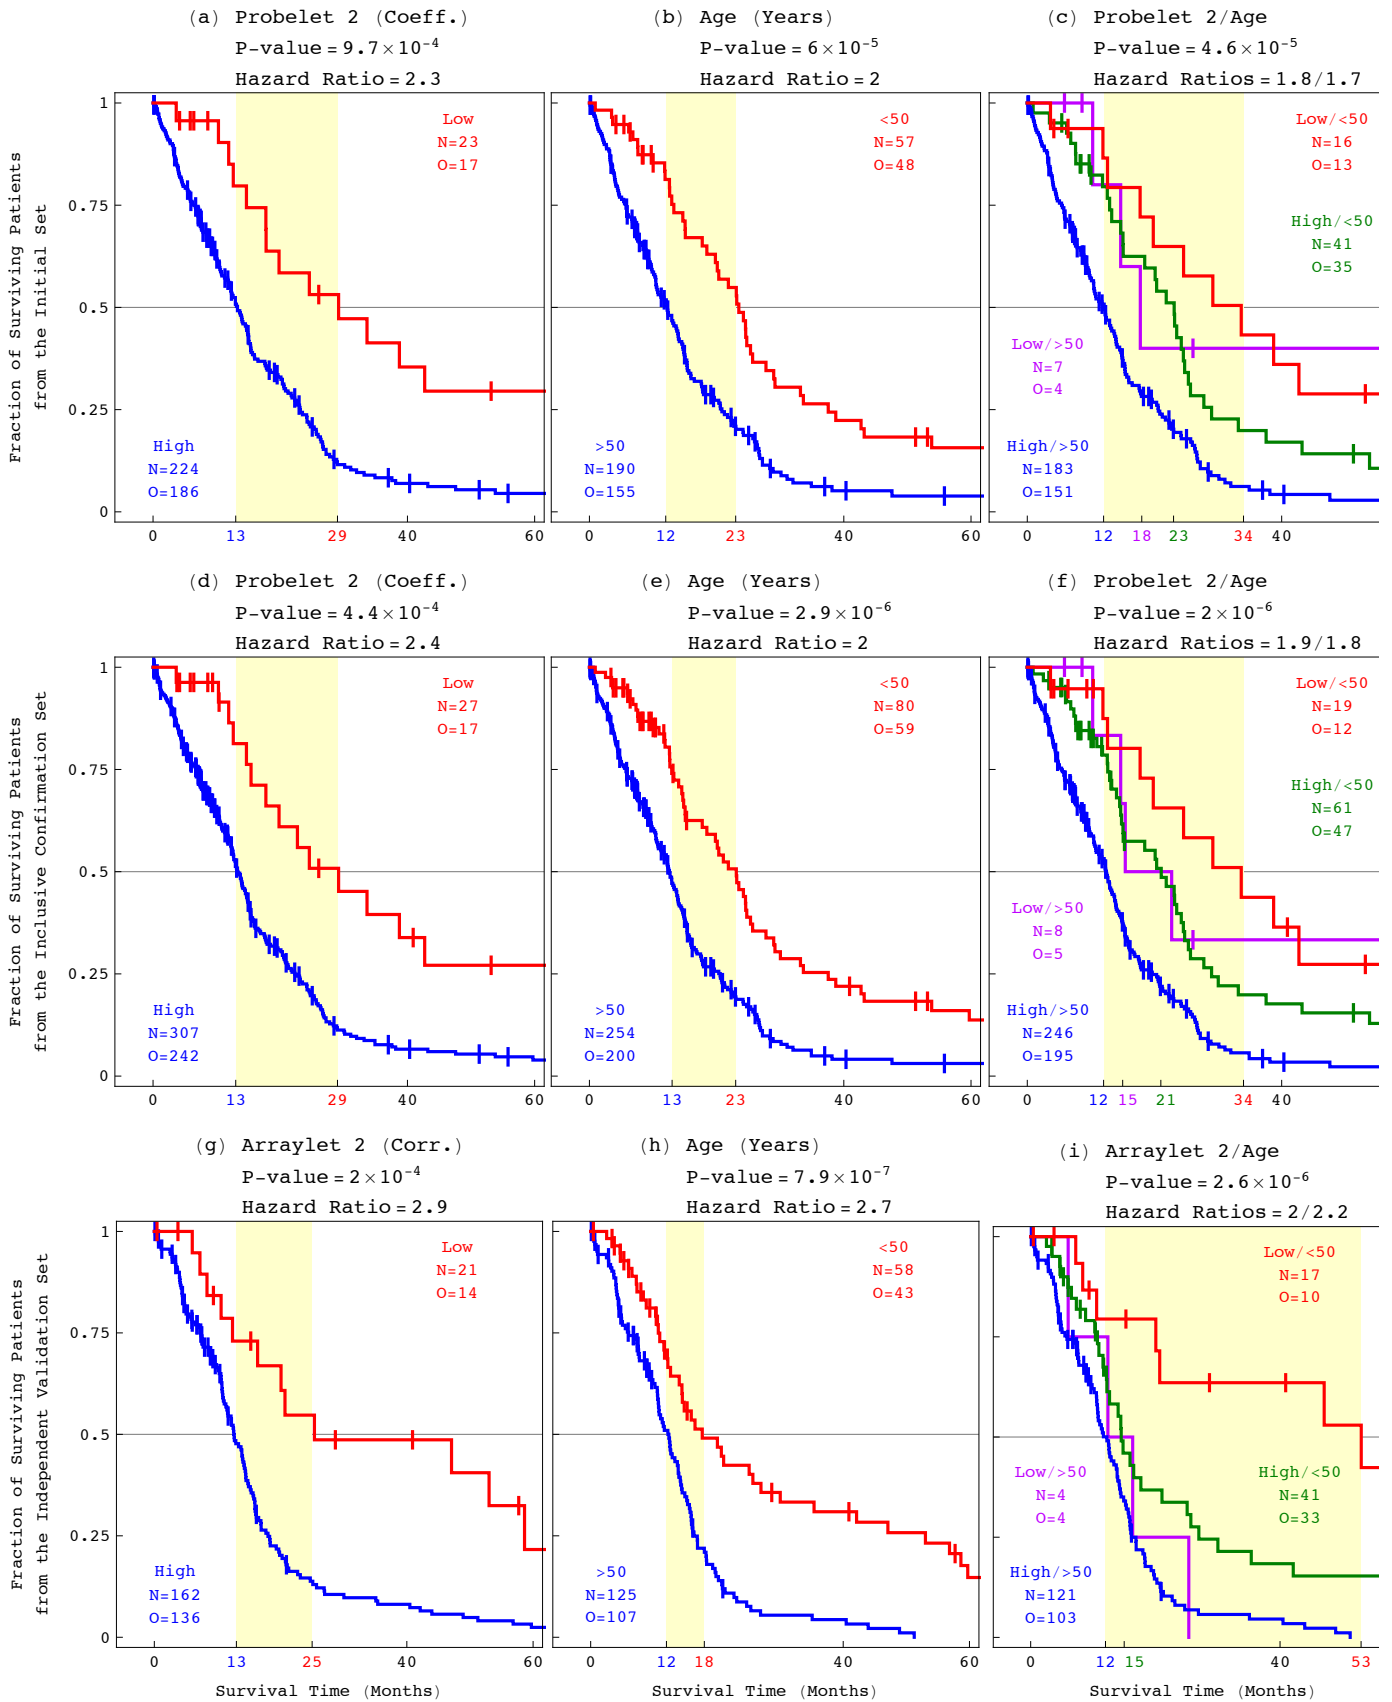

Export[path <> "Figure\_3.pdf", fig3, "PDF", ImageSize -> 750, ImageResolution -> resolution];

```
(* Create Survival Analyses of Classification by Chemotherapy or GSVD/Chemotherapy *)
```

```
(* Read TCGA Annotations of the Initial Set of 251 Patients *)
```

```
stream = path <> "251_Patients.txt";
annotations = Import[stream, "Table"];
{patients, annotationsNumber} = Dimensions[annotations] - {1, 1};
annotationnames = Take[annotations, 1, {2, annotationsNumber + 1}][[1]];
annotations = Drop[Import[stream, "Table"], 1, 1];
Clear[stream];

times = Table[
  If[annotationColumn["Days_Death"][[a]] == "Null",
    If[annotationColumn["Days_Followup"][[a]] == "Null",
      "Null",
      annotationColumn["Days_Followup"][[a]] / monthConversion],
    annotationColumn["Days_Death"][[a]] / monthConversion],
  {a, 1, patients}];
status = Table[
  If[annotationColumn["Probelet_2/Chemotherapy"][[a]] == "Null", 2,
    If[annotationColumn["Days_Death"][[a]] == "Null",
      If[annotationColumn["Days_Followup"][[a]] == "Null", 2, 0], 1]],
  {a, 1, patients}];
positionNull = Position[status, 2];
Do[{
  annotations = Drop[annotations, positionNull[[a]]],
  times = Drop[times, positionNull[[a]]],
  status = Drop[status, positionNull[[a]]]},
  {a, Dimensions[positionNull][[1]], 1, -1}];
patients = patients - Dimensions[positionNull][[1]];

displayNumber = 2;

annotation = "Chemotherapy";
highlight = True;
xplotlabel = "(a)";
xlabel = False;
ylabel = "from the Initial Set";
medianTicks = Table["", {a, 1, 8}];
hazardRatio = " = 2.6";
g1 = Show[display[annotation, displayNumber,
  xplotlabel, xlabel, ylabel, medianTicks, highlight], ImageSize -> 250];

displayNumber = 4;

annotation = "Probelet_2/Chemotherapy";
highlight = True;
xplotlabel = "(b)";
xlabel = False;
ylabel = "False";
medianTicks = Table["", {a, 1, 8}];
pValue = 6.1 * 10^-15;
hazardRatio = "s = 3/3.1";
g2 = Show[display[annotation, displayNumber,
  xplotlabel, xlabel, ylabel, medianTicks, highlight], ImageSize -> 250];
```

```
(* Read TCGA Annotations of the Inclusive Set of 344 Patients *)
```

```
stream = path <> "344_Patients.txt";
annotations = Import[stream, "Table"];
{patients, annotationsNumber} = Dimensions[annotations] - {1, 1};
annotationnames = Take[annotations, 1, {2, annotationsNumber + 1}][[1]];
annotations = Drop[Import[stream, "Table"], 1, 1];
Clear[stream];

times = Table[
  If[annotationColumn["Days_Death"][[a]] == "Null",
    If[annotationColumn["Days_Followup"][[a]] == "Null",
      "Null",
      annotationColumn["Days_Followup"][[a]] / monthConversion,
      annotationColumn["Days_Death"][[a]] / monthConversion],
    {a, 1, patients}];
status = Table[
  If[annotationColumn["Probelet_2/Chemotherapy"][[a]] == "Null", 2,
    If[annotationColumn["Days_Death"][[a]] == "Null",
      If[annotationColumn["Days_Followup"][[a]] == "Null", 2, 0], 1]],
    {a, 1, patients}];
positionNull = Position[status, 2];
Do[{
  annotations = Drop[annotations, positionNull[[a]]],
  times = Drop[times, positionNull[[a]]],
  status = Drop[status, positionNull[[a]]],
  {a, Dimensions[positionNull][[1]], 1, -1}
}, positionNull];
patients = patients - Dimensions[positionNull][[1]];

displayNumber = 2;

annotation = "Chemotherapy";
highlight = True;
xplotlabel = "(c)";
xlabel = False;
ylabel = "from the Inclusive Confirmation Set";
medianTicks = Table["", {a, 1, 8}];
hazardRatio = " = 2.7";
g3 = Show[display[annotation, displayNumber,
  xplotlabel, xlabel, ylabel, medianTicks, highlight], ImageSize -> 250];

displayNumber = 4;

annotation = "Probelet_2/Chemotherapy";
highlight = True;
xplotlabel = "(d)";
xlabel = False;
ylabel = "False";
medianTicks = Table["", {a, 1, 8}];
pValue = 5.8 * 10^-18;
hazardRatio = "s = 3.1/3.2";
g4 = Show[display[annotation, displayNumber,
  xplotlabel, xlabel, ylabel, medianTicks, highlight], ImageSize -> 250];
```

```
(* Read TCGA Annotations of the Independent Set of 184 Patients *)
```

```
stream = path <> "184_Patients.txt";
annotations = Import[stream, "Table"];
{patients, annotationsNumber} = Dimensions[annotations] - {1, 1};
annotationnames = Take[annotations, 1, {2, annotationsNumber + 1}][[1]];
annotations = Drop[Import[stream, "Table"], 1, 1];
Clear[stream];

times = Table[
  If[annotationColumn["Days_Death"][[a]] == "Null",
    If[annotationColumn["Days_Followup"][[a]] == "Null",
      "Null",
      annotationColumn["Days_Followup"][[a]] / monthConversion,
      annotationColumn["Days_Death"][[a]] / monthConversion],
    {a, 1, patients}];
status = Table[
  If[annotationColumn["Arraylet_2/Chemotherapy"][[a]] == "Null", 2,
    If[annotationColumn["Days_Death"][[a]] == "Null",
      If[annotationColumn["Days_Followup"][[a]] == "Null", 2, 0], 1]],
  {a, 1, patients}];
positionNull = Position[status, 2];
Do[{
  annotations = Drop[annotations, positionNull[[a]]],
  times = Drop[times, positionNull[[a]]],
  status = Drop[status, positionNull[[a]]],
  {a, Dimensions[positionNull][[1]], 1, -1}
}, {a, positionNull[[1]], 1, -1}];
patients = patients - Dimensions[positionNull][[1]];

displayNumber = 2;

annotation = "Chemotherapy";
highlight = True;
xplotlabel = "(e)";
xlabel = True;
ylabel = "from the Independent Validation Set";
medianTicks = Table["", {a, 1, 8}];
hazardRatio = "= 2.2";
g5 = Show[display[annotation, displayNumber,
  xplotlabel, xlabel, ylabel, medianTicks, highlight], ImageSize -> 250];

displayNumber = 4;

annotation = "Arraylet_2/Chemotherapy";
highlight = True;
xplotlabel = "(f)";
xlabel = True;
ylabel = "False";
medianTicks = Table["", {a, 1, 8}];
pValue = 5.9 * 10^-8;
hazardRatio = "s = 3.3/2.7";
g6 = Show[display[annotation, displayNumber,
  xplotlabel, xlabel, ylabel, medianTicks, highlight], ImageSize -> 250];
```

sFig16 = GraphicsGrid[{{g1, g2}, {g3, g4}, {g5, g6}}, ImageSize -> 500, Spacings -> {-56, 0}]

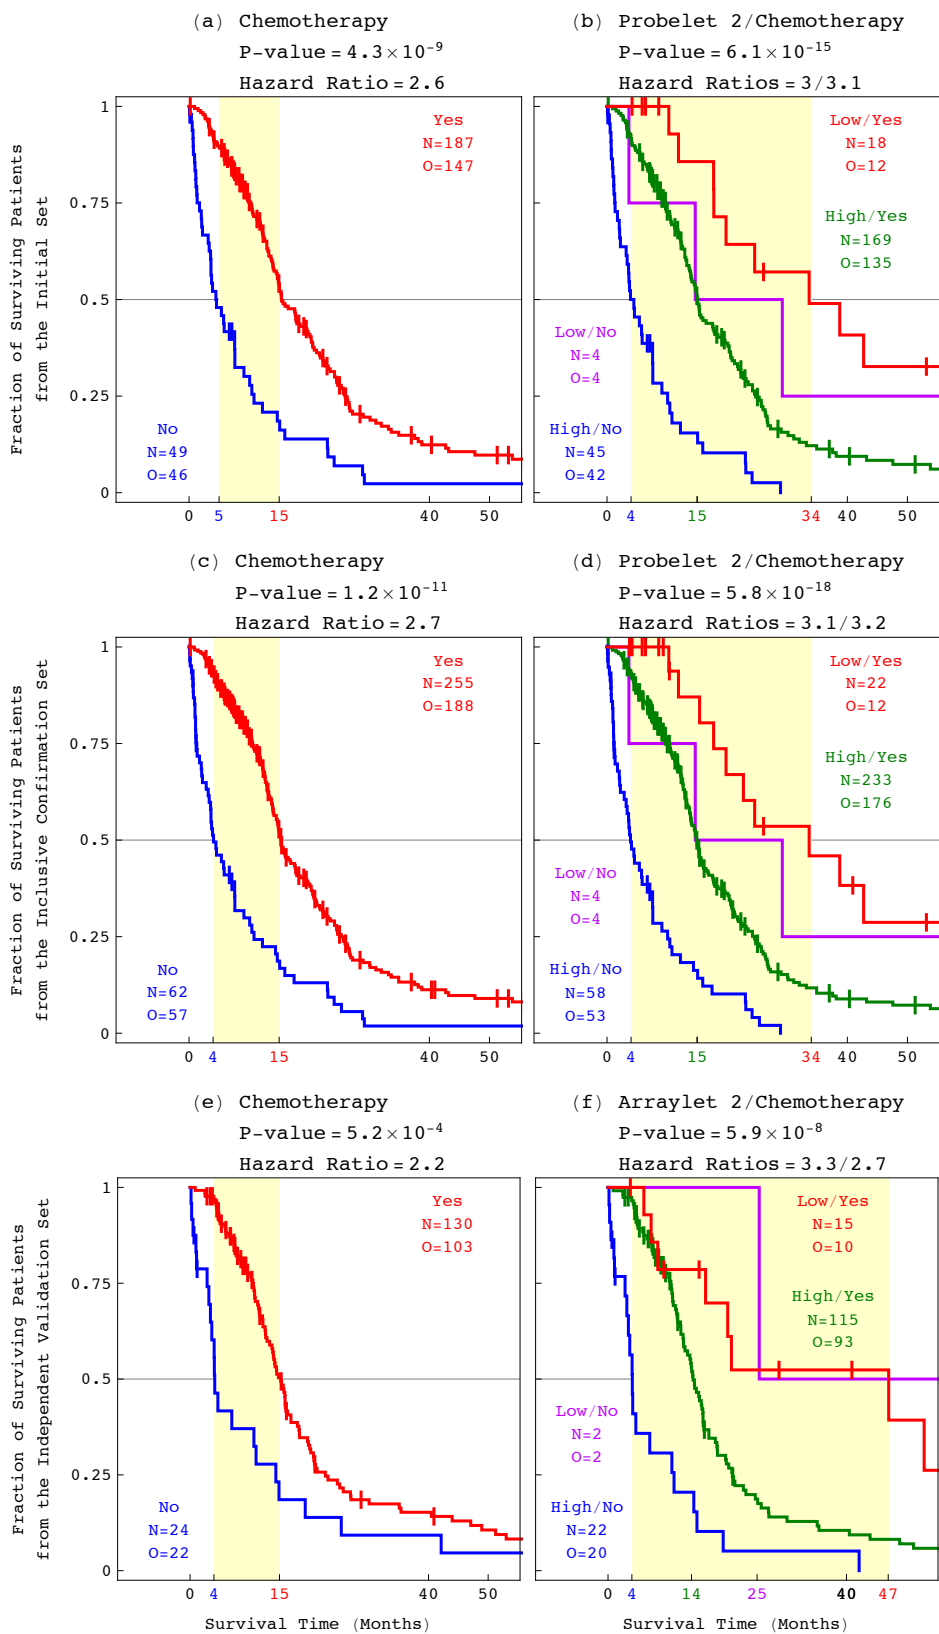

Export[path <> "Supplementary\_Figure\_16.pdf",  
sFig16, "PDF", ImageSize -> 500, ImageResolution -> resolution];



(\* Create Survival Analyses of Classification of Chemotherapy Patients by Focal CNAs \*)

```
title = "Fraction of Surviving Chemotherapy";

stream = path <> "251_Patients.txt";
annotations = Import[stream, "Table"];
{patients, annotationsNumber} = Dimensions[annotations] - {1, 1};
annotationnames = Take[annotations, 1, {2, annotationsNumber + 1}][[1]];
annotations = Drop[Import[stream, "Table"], 1, 1];
Clear[stream];

times = Table[
  If[annotationColumn["Days_Death"][[a]] == "Null",
    If[annotationColumn["Days_Followup"][[a]] == "Null",
      "Null",
      annotationColumn["Days_Followup"][[a]] / monthConversion],
    annotationColumn["Days_Death"][[a]] / monthConversion],
  {a, 1, patients}];
status = Table[
  If[annotationColumn["Chemotherapy"][[a]] == "Null", 2,
  If[annotationColumn["Chemotherapy"][[a]] == "No", 2,
  If[annotationColumn["Days_Death"][[a]] == "Null",
    If[annotationColumn["Days_Followup"][[a]] == "Null", 2, 0], 1]],
  {a, 1, patients}];
positionNull = Position[status, 2];
Do[{
  annotations = Drop[annotations, positionNull[[a]]],
  times = Drop[times, positionNull[[a]]],
  status = Drop[status, positionNull[[a]]],
  {a, Dimensions[positionNull][[1]], 1, -1}
}, positionNull];
patients = patients - Dimensions[positionNull][[1]];

displayNumber = 2;

annotation = "MDM4_(Segment_14)";
highlight = True;
xplotlabel = "(a)";
xlabel = False;
ylabel = "Patients from the Initial Set";
medianTicks = Table["", {a, 1, 8}];
medianTicks[[2]] = " ";
medianTicks[[3]] = " ";
hazardRatio = "";
g1 = Show[display[annotation, displayNumber,
  xplotlabel, xlabel, ylabel, medianTicks, highlight], ImageSize -> 250];

annotation = "AKT3_(Segment_17)";
highlight = True;
xplotlabel = "(b)";
xlabel = False;
ylabel = "False";
medianTicks = Table["", {a, 1, 8}];
medianTicks[[2]] = " ";
medianTicks[[3]] = " ";
hazardRatio = "";
g2 = Show[display[annotation, displayNumber,
  xplotlabel, xlabel, ylabel, medianTicks, highlight], ImageSize -> 250];
```

```

annotation = "EGFR_(Segment_44)";
highlight = True;
xplotlabel = "(c)";
xlabel = False;
ylabel = "False";
medianTicks = Table["", {a, 1, 8}];
medianTicks[[2]] = " ";
medianTicks[[3]] = " ";
hazardRatio = "";
g3 = Show[display[annotation, displayNumber,
  xplotlabel, xlabel, ylabel, medianTicks, highlight], ImageSize -> 250];

annotation = "MET_(Segment_53)";
highlight = True;
xplotlabel = "(d)";
xlabel = False;
ylabel = "Patients from the Initial Set";
medianTicks = Table["", {a, 1, 8}];
medianTicks[[2]] = " ";
medianTicks[[3]] = " ";
hazardRatio = "";
g4 = Show[display[annotation, displayNumber,
  xplotlabel, xlabel, ylabel, medianTicks, highlight], ImageSize -> 250];

annotation = "METTL2B_(Segment_54)";
highlight = True;
xplotlabel = "(e)";
xlabel = False;
ylabel = "False";
medianTicks = Table["", {a, 1, 8}];
hazardRatio = "";
g5 = Show[display[annotation, displayNumber,
  xplotlabel, xlabel, ylabel, medianTicks, highlight], ImageSize -> 250];

annotation = "CDKN2A/B_(Segment_62)";
highlight = True;
xplotlabel = "(f)";
xlabel = False;
ylabel = "False";
medianTicks = Table["", {a, 1, 8}];
medianTicks[[1]] = " ";
medianTicks[[4]] = " ";
hazardRatio = "";
g6 = Show[display[annotation, displayNumber,
  xplotlabel, xlabel, ylabel, medianTicks, highlight], ImageSize -> 250];

annotation = "PTEN_(Segment_80)";
highlight = True;
xplotlabel = "(g)";
xlabel = False;
ylabel = "Patients from the Initial Set";
medianTicks = Table["", {a, 1, 8}];
medianTicks[[1]] = " ";
medianTicks[[4]] = " ";
hazardRatio = "";
g7 = Show[display[annotation, displayNumber,
  xplotlabel, xlabel, ylabel, medianTicks, highlight], ImageSize -> 250];

annotation = "KDM5A_(Segment_90)";
highlight = True;
xplotlabel = "(h)";
xlabel = False;
ylabel = "False";
medianTicks = Table["", {a, 1, 8}];
medianTicks[[1]] = " ";
medianTicks[[4]] = " ";
hazardRatio = "";
g8 = Show[display[annotation, displayNumber,
  xplotlabel, xlabel, ylabel, medianTicks, highlight], ImageSize -> 250];

```

```

annotation = "CDK4_(Segment_94)";
highlight = True;
xplotlabel = "(i)";
xlabel = False;
ylabel = "False";
medianTicks = Table["", {a, 1, 8}];
medianTicks[[2]] = " ";
medianTicks[[3]] = " ";
hazardRatio = "";
g9 = Show[display[annotation, displayNumber,
  xplotlabel, xlabel, ylabel, medianTicks, highlight], ImageSize -> 250];

annotation = "MDM2_(Segment_102)";
highlight = True;
xplotlabel = "(j)";
xlabel = True;
ylabel = "Patients from the Initial Set";
medianTicks = Table["", {a, 1, 8}];
medianTicks[[1]] = " ";
medianTicks[[4]] = " ";
hazardRatio = "";
g10 = Show[display[annotation, displayNumber,
  xplotlabel, xlabel, ylabel, medianTicks, highlight], ImageSize -> 250];

annotation = "TLK2/METTLL2A_(Segment_112)";
highlight = True;
xplotlabel = "(k)";
xlabel = True;
ylabel = "False";
medianTicks = Table["", {a, 1, 8}];
hazardRatio = "";
g11 = Show[display[annotation, displayNumber,
  xplotlabel, xlabel, ylabel, medianTicks, highlight], ImageSize -> 250];

annotation = "CCNE1_(Segment_118)";
highlight = True;
xplotlabel = "(l)";
xlabel = True;
ylabel = "False";
medianTicks = Table["", {a, 1, 8}];
medianTicks[[2]] = " ";
medianTicks[[3]] = " ";
hazardRatio = "";
g12 = Show[display[annotation, displayNumber,
  xplotlabel, xlabel, ylabel, medianTicks, highlight], ImageSize -> 250];

```

**sFig15 = GraphicsGrid[{{g1, g2, g3}, {g4, g5, g6}, {g7, g8, g9}, {g10, g11, g12}},  
ImageSize → 750, Spacings → {-42, 2}]**

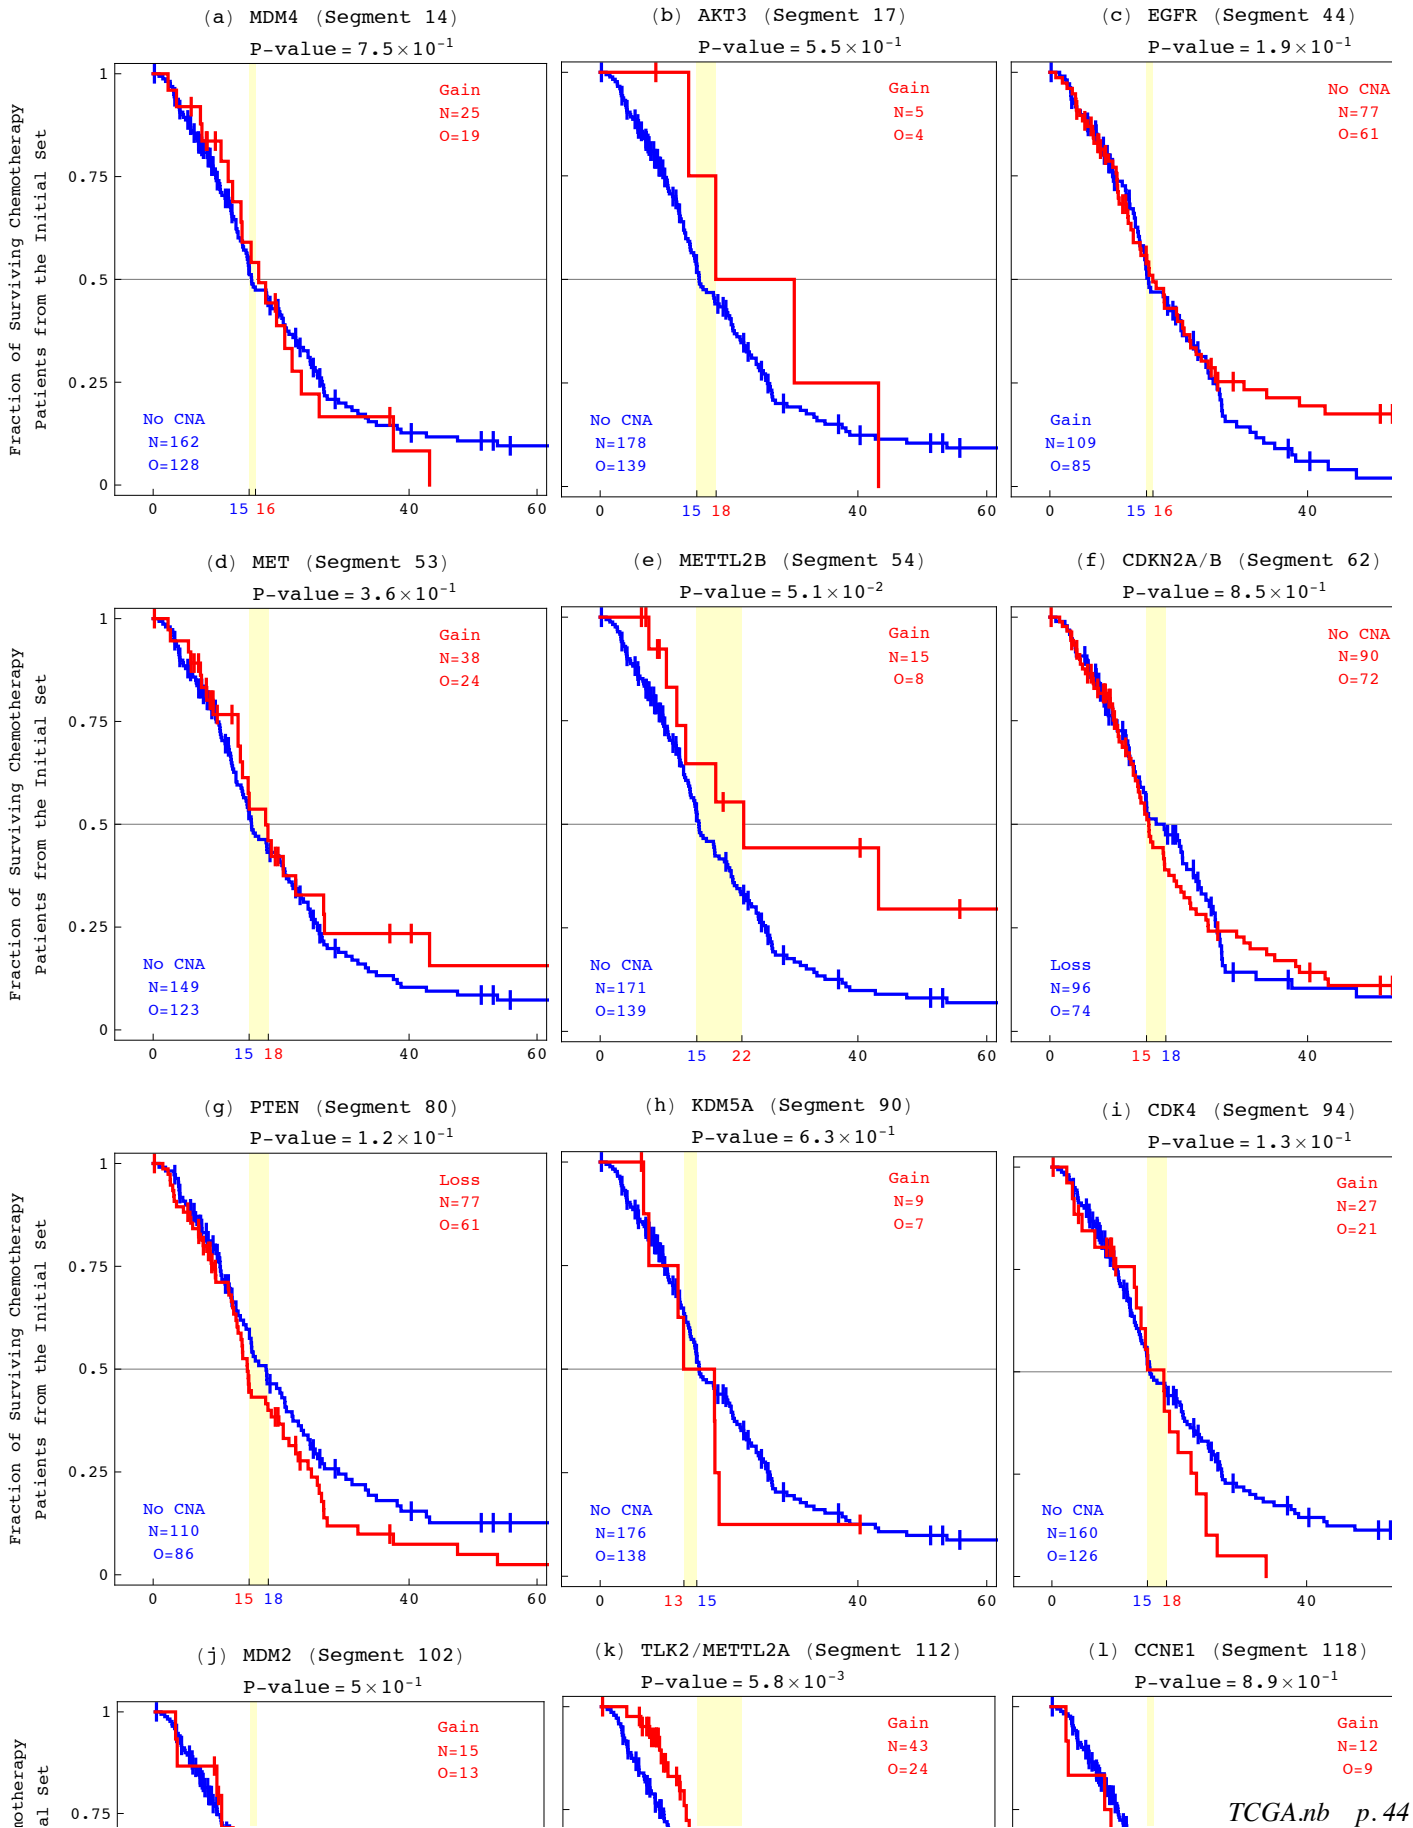

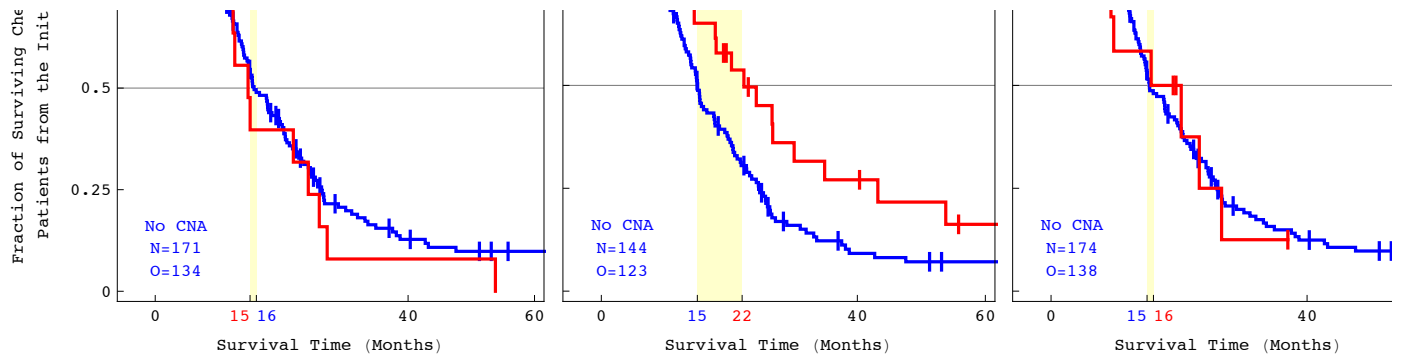

```
Export[path <> "Supplementary_Figure_15.pdf",
  sFig15, "PDF", ImageSize -> 750, ImageResolution -> resolution];
```

(\* Create Survival Analysis of Classification of Chemotherapy Patients by IDH1 Mutation \*)

```
annotation = "IDH1_Mutation";
highlight = True;
xplotlabel = " ";
xlabel = True;
ylabel = "Patients from the Initial Set";
medianTicks = Table["", {a, 1, 8}];
hazardRatio = "";
sFig12 = Show[display[annotation, displayNumber,
  xplotlabel, xlabel, ylabel, medianTicks, highlight], ImageSize -> 250]
```

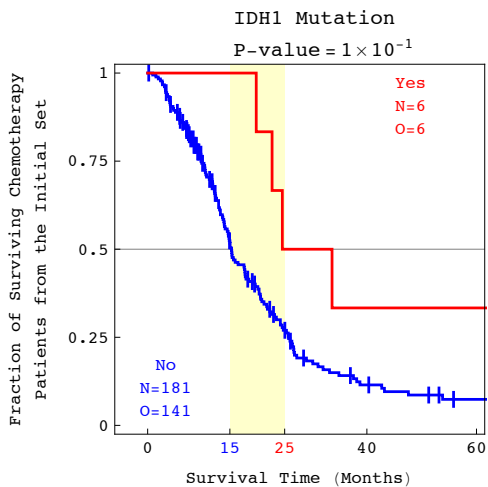

```
Export[path <> "Supplementary_Figure_12.pdf",
  sFig12, "PDF", ImageSize -> 250, ImageResolution -> resolution];
```

(\* Create Survival Analysis of GSVD Classification of Chemotherapy Patients \*)

```
annotation = "Probelet_2_(Coeff.)";
highlight = True;
xplotlabel = "(a)";
xlabel = False;
ylabel = "Patients from the Initial Set";
medianTicks = Table["", {a, 1, 8}];
hazardRatio = "";
g1 = Show[display[annotation, displayNumber,
  xplotlabel, xlabel, ylabel, medianTicks, highlight], ImageSize -> 250];
```

```
(* Read TCGA Annotations of the Inclusive Set of 344 Patients *)
```

```
stream = path <> "344_Patients.txt";
annotations = Import[stream, "Table"];
{patients, annotationsNumber} = Dimensions[annotations] - {1, 1};
annotationnames = Take[annotations, 1, {2, annotationsNumber + 1}][[1]];
annotations = Drop[Import[stream, "Table"], 1, 1];
Clear[stream];

times = Table[
  If[annotationColumn["Days_Death"][[a]] == "Null",
    If[annotationColumn["Days_Followup"][[a]] == "Null",
      "Null",
      annotationColumn["Days_Followup"][[a]] / monthConversion,
      annotationColumn["Days_Death"][[a]] / monthConversion],
    {a, 1, patients}];
status = Table[
  If[annotationColumn["Chemotherapy"][[a]] == "Null", 2,
  If[annotationColumn["Chemotherapy"][[a]] == "No", 2,
  If[annotationColumn["Days_Death"][[a]] == "Null",
    If[annotationColumn["Days_Followup"][[a]] == "Null", 2, 0], 1]],
  {a, 1, patients}];
positionNull = Position[status, 2];
Do[{
  annotations = Drop[annotations, positionNull[[a]]],
  times = Drop[times, positionNull[[a]]],
  status = Drop[status, positionNull[[a]]],
  {a, Dimensions[positionNull][[1]], 1, -1}}
patients = patients - Dimensions[positionNull][[1]];

annotation = "Probelet_2_(Coeff.)";
highlight = True;
xplotlabel = "(b)";
xlabel = False;
ylabel = "Patients from the Inclusive Set";
medianTicks = Table["", {a, 1, 8}];
hazardRatio = "";
g2 = Show[display[annotation, displayNumber,
  xplotlabel, xlabel, ylabel, medianTicks, highlight], ImageSize -> 250];
```

```
(* Read TCGA Annotations of the Independent Set of 184 Patients *)
```

```
stream = path <> "184_Patients.txt";
annotations = Import[stream, "Table"];
{patients, annotationsNumber} = Dimensions[annotations] - {1, 1};
annotationnames = Take[annotations, 1, {2, annotationsNumber + 1}][[1]];
annotations = Drop[Import[stream, "Table"], 1, 1];
Clear[stream];

times = Table[
  If[annotationColumn["Days_Death"][[a]] == "Null",
    If[annotationColumn["Days_Followup"][[a]] == "Null",
      "Null",
      annotationColumn["Days_Followup"][[a]] / monthConversion,
      annotationColumn["Days_Death"][[a]] / monthConversion],
    {a, 1, patients}];
status = Table[
  If[annotationColumn["Chemotherapy"][[a]] == "Null", 2,
  If[annotationColumn["Chemotherapy"][[a]] == "No", 2,
  If[annotationColumn["Days_Death"][[a]] == "Null",
    If[annotationColumn["Days_Followup"][[a]] == "Null", 2, 0], 1]],
  {a, 1, patients}];
positionNull = Position[status, 2];
Do[{
  annotations = Drop[annotations, positionNull[[a]]],
  times = Drop[times, positionNull[[a]]],
  status = Drop[status, positionNull[[a]]],
  {a, Dimensions[positionNull][[1]], 1, -1}}
patients = patients - Dimensions[positionNull][[1]];

annotation = "Arraylet_2_(Corr.)";
highlight = True;
xplotlabel = "(c)";
xlabel = True;
ylabel = "Patients from the Independent Set";
medianTicks = Table["", {a, 1, 8}];
hazardRatio = "";
g3 = Show[display[annotation, displayNumber,
  xplotlabel, xlabel, ylabel, medianTicks, highlight], ImageSize -> 250];
```

**sFig10 = GraphicsGrid[{{g1}, {g2}, {g3}}, ImageSize -> 250, Spacings -> {-56, 0}]**

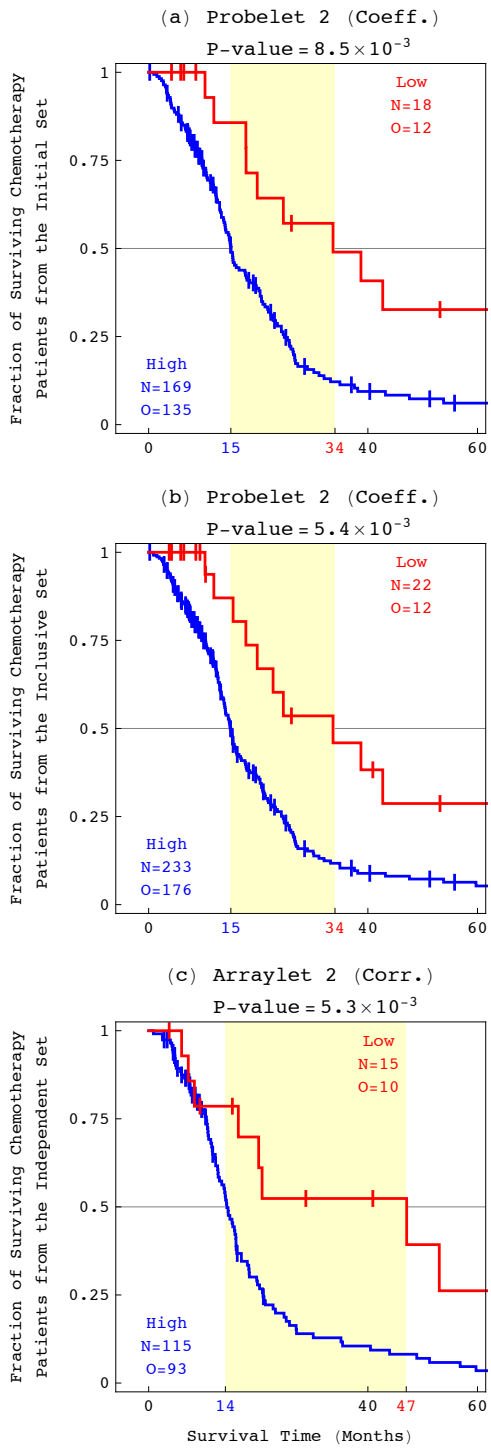

**Export[path <> "Supplementary\_Figure\_10.pdf",  
sFig10, "PDF", ImageSize -> 250, ImageResolution -> resolution];**
